1 **Characterizing the innate and adaptive responses of immunized mice to *Bordetella***  
2 ***pertussis* infection using *in vivo* imaging and transcriptomic analysis**

3 Short title: neutrophil responses to pertussis in mice

4

5 Dylan T. Boehm<sup>a</sup>, Melinda E. Varney<sup>a</sup>, Ting Y. Wong<sup>a</sup>, Evan S. Nowak<sup>a</sup>, Emel Sen-Kilic<sup>a</sup>, Jesse  
6 Hall<sup>a</sup>, Shelby D. Bradford<sup>a</sup>, Katherine DeRoos<sup>a</sup>, Justin Bevere<sup>a</sup>, Matthew Epperly<sup>a</sup>, Jennifer A.  
7 Maynard<sup>b</sup>, Erik L. Hewlett<sup>c</sup>, Mariette Barbier<sup>a</sup>, and F. Heath Damron<sup>a\*</sup>

8

9 <sup>a</sup> Department of Microbiology, Immunology, and Cell Biology, West Virginia University,  
10 Morgantown, WV, USA

11 <sup>b</sup> Department of Chemical Engineering, University of Texas at Austin, Austin, TX 78712, USA

12 <sup>c</sup> Department of Medicine, Division of Infectious Diseases and International Health, University of  
13 Virginia, Charlottesville, Virginia, USA

14 \*Corresponding author

15 Email: [fdamron@hsc.wvu.edu](mailto:fdamron@hsc.wvu.edu)

16

17

18 **Abstract**

19 *Bordetella pertussis* (*B. pertussis*) is the causative agent of pertussis (whooping cough).  
20 Since the 1990s, pertussis has re-emerged in the United States despite an estimated  
21 95% vaccine coverage. Our goal was to characterize neutrophil responses and gene  
22 expression profiles of murine lungs in the context of vaccination and *B. pertussis*  
23 challenge. We utilized a bioluminescent neutrophil mouse model (NECre luc) to track  
24 neutrophil recruitment. NECre luc mice were immunized with whole cell vaccine (WCV),  
25 acellular vaccine (ACV), or a truncated adenylate cyclase toxoid (RTX) vaccine.  
26 Neutrophil recruitment was measured in live mice across time and corroborated by flow  
27 cytometry and other data. WCV immunized mice showed signs of neutrophilia in response  
28 to *B. pertussis* challenge. Mice immunized with either ACV or WCV cleared the challenge  
29 infection; however immunization with RTX alone was not protective. RNA sequencing  
30 revealed distinctive gene expression profiles for each immunization group. We observed  
31 an increase in expression of genes associated with responses to infection, and changes  
32 in expression of distinct genes in each vaccine group, providing a complex view of the  
33 immune response to *B. pertussis* infection in mice. This study suggests that combination  
34 of immunological analysis with transcriptomic profiling can facilitate discovery of pre-  
35 clinical correlates of protection for vaccine development.

36

37

38

39

40

## 41 Introduction

42 Pertussis is a human disease primarily caused by a respiratory infection of the Gram-  
43 negative pathogen *Bordetella pertussis* (*B. pertussis*). The hallmark of pertussis is a distinctive  
44 whooping cough. What is surprising about pertussis is that the cause of the cough has never been  
45 elucidated, which highlights the fact that there are many under-researched aspects of this  
46 disease. Aerosolized *B. pertussis* bacterium are inhaled and adhere to airway respiratory  
47 epithelial cells through bacterial adhesins such as filamentous hemagglutinin (FHA), fimbriae and  
48 pertactin<sup>1</sup>. After colonization *B. pertussis* express multiple toxins including pertussis toxin (PT)  
49 and adenylate cyclase toxin (ACT). *B. pertussis* releases PT, which dysregulates the immune  
50 response through ADP-ribosylation of the G-protein  $\alpha$ -subunit of cytokine receptors present on a  
51 range of leukocytes<sup>2-5</sup>. The secretion of PT has long range effects, ACT is thought to act locally  
52 on host cells by converting ATP into supraphysiological levels of cAMP, further dysregulating the  
53 host immune response<sup>6</sup>.

54 In the 1940s, an effective whole cell vaccine (WCV) was developed and as a result, basic research  
55 efforts on *B. pertussis* decreased. The WCVs were highly reactogenic and caused prolonged and  
56 unusual crying after administration, hyporesponsiveness, and febrile convulsions<sup>7-9</sup>. These issues  
57 led to the development of acellular vaccines (ACV), known today as DTaP/Tdap (hereafter  
58 referred to as ACV). The ACVs utilize an alum adjuvant and induce a Th2 response to several  
59 key virulence factors such as PT, FHA, fimbriae, and pertactin depending on vaccine formulations.  
60 Whereas the ACV induces a Th2 response in human and mice, WCV immunization and *B.*  
61 *pertussis* infection promote a Th1/Th17-type response<sup>10-14</sup>. Since the replacement of the WCV  
62 with the ACVs there has been a remarkable increase in the number of cases in the US, with the  
63 number of reported cases in 2012 equaling that of 1954. Multiple factors potentially played a role  
64 in the return of pertussis in the US. It has been documented that the Th2 response induced by  
65 ACV immunization may be inferior to the Th1/Th17 response directed by the WCV<sup>15</sup>. Additionally,

66 ACV protection wanes significantly as early as one year after vaccination, and by 4 years after  
67 vaccination vaccine effectiveness is only 9%<sup>16</sup>. Furthermore, in a non-human primate model it has  
68 been shown that ACV immunized baboons challenged with *B. pertussis* are capable of carrying  
69 the infection and transmitting aerosolized *B. pertussis* to naïve baboons<sup>17</sup>. Additionally, the  
70 findings of an epidemiological study suggest that asymptomatic transmission of pertussis is  
71 indeed occurring in the human population, and has a role in the increase of pertussis incidents<sup>18</sup>.  
72 These recent findings demonstrate the shortcomings of the ACV. Utilizing new technologies that  
73 were not available during the developments of the WCV or ACVs we can further investigate  
74 differences between WCV and ACV protection. Adenylate cyclase toxin (ACT) is an essential  
75 virulence factor of *B. pertussis* and a known protective antigen<sup>19–21</sup>. ACT contains two main  
76 domains: adenylate cyclase and the Repeats-in-Toxin (RTX). In the absence of the AC domain,  
77 the protein is non-toxic and referred to simply as RTX<sup>22</sup>. In a previous study, sera from mice  
78 immunized with RTX contained antibodies capable of neutralizing ACT. ACT antigens are not  
79 included in any commercial formulations of ACVs and many have proposed that its inclusion could  
80 improve protection<sup>6</sup>.

81 Neutrophils play a role in both the innate and adaptive arms of the immune system.  
82 Following *B. pertussis* infection of a naïve mouse, neutrophils reach peak recruitment between 5  
83 and 7 days after challenge<sup>23,24</sup>. This occurs after the bacterial burden has begun to decrease.  
84 Subsequent studies have determined that neutrophil depletion prior to *B. pertussis* infection in  
85 naïve mice does not increase bacterial burden. However, when immunized mice are challenged  
86 with *B. pertussis* following depletion of neutrophils the *B. pertussis* bacterial burden increase,  
87 demonstrating a protective role of neutrophils in immunized mice<sup>25</sup>. As previously mentioned, *B.*  
88 *pertussis* toxins PT and ACT both affect neutrophils and their recruitment<sup>6,26–28</sup>. These toxins  
89 contribute to a significant rise in the number of circulating white blood cells and in severe cases  
90 leukocytosis is linked to fatality<sup>1</sup>. Leukocytosis was first described in pertussis patients as early  
91 as the 1890s<sup>29,30</sup>. In the 1960's, Stephen Morse observed leukocytosis following WCV

92 immunization<sup>31</sup>, which he hypothesized was caused by PT, then known as leukocytosis-inducing  
93 factor<sup>32</sup>. Therefore, it can be conceived that the toxin associated effects on neutrophils would be  
94 neutralized following ideal *B. pertussis* immunization, and this raises the question of where and  
95 when neutrophils are recruited in an ACV or WCV protected mouse?

96 In this study, we utilized *in vivo* imaging systems (IVIS) to characterize the neutrophil  
97 responses to *B. pertussis* challenge in mice vaccinated with ACV or WCV. We implemented  
98 NECre luc mice, a luminescent neutrophil reporter mouse strain, previously used in a *Bacillus*  
99 *anthracis* infection model to track neutrophil recruitment following *B. pertussis* challenge<sup>33</sup>. To do  
100 so, we: 1) validated the NECre luc mouse as a model for tracking neutrophil recruitment in  
101 response to *B. pertussis* infection, 2) tracked the spatiotemporal localization of neutrophils in  
102 response to *B. pertussis* challenge in ACV and WCV vaccinated mice, and 3) and characterized  
103 vaccine-associated gene expression profiles of the infected lungs from each group using RNA  
104 sequencing. The NeCRE luc mouse<sup>33</sup> was used to measure the presence and relative quantities  
105 of neutrophils in live mice during *B. pertussis* challenge. We then corroborated our findings with  
106 flow cytometry analysis to quantify neutrophils in the blood and airway of naïve and immunized  
107 mice. WCV immunization resulted in robust neutrophil recruitment and clearance of *B. pertussis*,  
108 but also resulted in morbidity of the NeCre luc mice. RNAseq analysis was performed on the  
109 lungs of naïve or immunized mice at both early and late time-points after challenge with *B.*  
110 *pertussis*. We observed specific gene signatures for each vaccine, and we also identified gene  
111 expression profiles that had not been associated with *B. pertussis* or immunization. Neutrophil  
112 specific gene expression corroborated our cellular analysis of the respiratory tract demonstrating  
113 increased expression of neutrophil specific genes in WCV immunized mice. Furthermore, we  
114 determined the T-helper cell gene expression profiles of lung transcriptomes and corroborated  
115 the activation of Th1 specific gene expression to increased levels of Th1-associated cytokine  
116 production in the lungs of WCV immunized mice. Utilizing the depth of data generated through  
117 RNAseq, we could classify specific B cell clonotypes present in the lung of each immunization

118 group. This technique allowed for analysis of the diversity and frequency of the immunoglobulin  
119 repertoire of immunized groups. We hypothesize that these approaches can continue to be  
120 applied to other pathogen to host interactions to characterize the underpinnings to disease  
121 progression and immunological responses.

## 122 **Results**

123 **ACV and WCV immunization of NECre luc mice results in clearance of *B. pertussis*,**  
124 **however WCV immunized mice experience increased morbidity and mortality.**

125 To characterize the effects of vaccination on neutrophil recruitment, NECre luc mice were  
126 immunized with the vaccines as indicated in Supplementary Table S1, and then boosted with the  
127 same vaccine 21 days later by intraperitoneal injection. We then compared the neutrophil  
128 recruitment in naïve, ACV, WCV, and RTX-only vaccinated NECre luc mice during *B. pertussis*  
129 challenge. At day 35 post initial immunization, NECre luc mic were challenged with virulent *B.*  
130 *pertussis* strain UT25 (Fig. 1) by intranasal instillation. A challenge dose of  $2 \times 10^7$  CFUs *B.*  
131 *pertussis* does not typically cause morbidity in immunocompetent mice such as CD-1 or C57B6/J  
132 (data not shown). We originally planned to euthanize 4 mice per group on each experimental day  
133 (1, 2, 4, and 9). However, 2 of 13 naïve challenged NECre luc mice were euthanized at day 2 due  
134 to morbidity (Fig. 2). At day 6, we observed additional unexpectedly morbidity in the WCV group,  
135 which required euthanasia of all remaining WCV immunized NECre luc mice (Fig. 2). Conversely,  
136 no morbidity was observed in the ACV and RTX immunized mice 9 days post *B. pertussis*  
137 challenge (Fig. 2). We were surprised to observe morbidity in the WCV immunized mice. Upon  
138 determining viable bacterial burden from lung, trachea, and nasal lavage, we observed clearance  
139 of *B. pertussis* to our limits of detection in both ACV and WCV immunized mice compared to naïve  
140 infection (Fig. 3abc). Taken together, these data suggested that morbidity of the WCV immunized  
141 mice was not fully attributed to bacterial burden. Additionally, we determined that vaccination with  
142 RTX resulted in 100 percent survival out to 9 days post-challenge (pc), while bacterial burden

143 were similar to naïve infected mice, suggesting that RTX immunization did not improve bacterial  
144 clearance (Fig. 3abc).

#### 145 **Analysis of serological responses of immunized mice.**

146 As expected, the ACV immunized mice were protected against challenge as they rapidly  
147 cleared the *B. pertussis* challenge dose (Fig. 3abc). WCV immunized mice cleared *B. pertussis*,  
148 but this response was delayed compared to the ACV mice. To determine the efficacy of  
149 immunization on antibody production, we performed serology analysis. PT is a common antigen  
150 of both the ACV and WCV and we observed a significantly higher concentration of anti-PT in the  
151 ACV mice compared to the WCV (Fig. 3d). Immunization of NECre mice with RTX with alum  
152 adjuvant resulted in high anti-RTX antibody titers (Fig. 3e) despite the fact that we did not see  
153 increased clearance due to RTX immunization. In another study, we immunized CD1 mice with  
154 RTX and alum adjuvant and we also saw no clearance of *B. pertussis* compared to non-  
155 vaccinated mice (data not shown). Our data suggest that, while immunization with RTX induces  
156 antibody production, it is not sufficient to protect mice from *B. pertussis* infection as a single,  
157 antigen vaccine.

#### 158 **Spatiotemporal IVIS imaging of neutrophils in naïve and vaccinated NECre luc mice.**

159 Neutrophil accumulation in NECre luc mice were visualized on days 1, 2, 4, 6 and 9 post-  
160 challenge. Mice were IP injected with the high sensitivity luciferin CycLuc1<sup>33</sup> before imaging. A  
161 Lumina II IVIS (Xenogen) was used to capture luciferase-driven neutrophil luminescence at  
162 indicated time-points (Fig. 4 and Supplementary Fig. 1). Luminescent signal of the whole body  
163 (Fig. 4d) or nasal cavity (Fig. 4e) of vaccinated mice was then compared to signal from naïve,  
164 non-infected mice and calculated as fold change. At day 1 post-challenge, we detected  
165 significantly higher luminescence in naïve challenged mice compared to naïve non-challenged  
166 mice, suggesting that there is a higher neutrophil accumulation in challenged mice. Furthermore,

167 whole body luminescence in WCV immunized and challenged mice was significantly higher than  
168 the whole body luminescence of naïve, ACV and RTX *B. pertussis* challenged mice at day 1 (Fig.  
169 4d). In general, luminescence signals of all groups decreased across days 2 and 4. However, in  
170 the WCV group at day 6, we detected an increase in signal in the nasal cavity (71-fold) and the  
171 whole body (47-fold) compared to naïve not challenged mice (Fig. 4de). Due to variability between  
172 animals, this increase was not significant compared to other groups. At this point WCV immunized  
173 mice were morbid and required euthanasia. Taken together this data suggests that WCV  
174 immunization prior to challenge resulted in increased neutrophil accumulation compared to other  
175 vaccination groups. We next aimed to corroborate our IVIS luminescence data with flow cytometry  
176 analysis of respiratory tissues.

#### 177 **Validation of neutrophil infiltration in respiratory tissue by flow cytometry**

178 Luminescent signal of luciferase-expressing cells correlates with the localization of  
179 neutrophils in NECre luc mice<sup>33</sup>. To confirm this, we measured the relative number of neutrophils  
180 by performing flow cytometry analysis on respiratory tissue following IVIS imaging. Single cell  
181 suspensions from lung tissue or nasal lavage were labelled with antibodies recognizing cell  
182 surface markers. We defined neutrophils as CD11b+GR-1+ live cells (Supplementary Fig. 2).  
183 Similar to the IVIS data, all *B. pertussis* challenged groups had significantly higher neutrophil  
184 percentages in nasal lavage compared to naïve non-challenged mice (Fig. 4f). At day 1 post *B.*  
185 *pertussis* challenge, WCV immunized mice had a significantly higher percentage of neutrophils  
186 than ACV immunized mice in nasal lavage. The percentages of neutrophils decreased from day  
187 1 to day 2 in all vaccinated groups, as well as the naïve group. At day 4, WCV immunized mice  
188 exhibited higher levels of neutrophils than those observed at day 2 (Fig. 4g). Correlating with the  
189 nasal lavage, WCV mice exhibited significantly higher percentages of neutrophils in the lungs  
190 than ACV mice. Lung neutrophils at day 4 were not statistically significant between any of the  
191 groups. However, by day 6 there was a 53% increase in lung neutrophils compared to day 4 in



192 the WCV group, which directly correlates with the increased luminescence signals measured by  
193 IVIS imaging (Fig. 4g).

194 **WCV immunized NECre luc mice induce a more robust Th1 immune response compared**  
195 **to ACV immunized mice.**

196 It has been previously documented that upon *B. pertussis* challenge, WCV immunized  
197 mice elicit a Th1/Th17 immune response, similar to a naïve infection while ACV immunized mice  
198 generate primarily a Th2 response<sup>10–12,34</sup>. We hypothesized that similar responses are triggered  
199 by WCV and ACV in the NECre luc model. To test this hypothesis, we determined the cytokine  
200 profiles in lungs of immunized and challenged mice using electrochemiluminescent sandwich  
201 immunoassays. The Th1 response was determined by increased levels of IFN- $\gamma$ , IL-12p70, IL-1 $\beta$   
202 and TNF- $\alpha$  (Fig. 5ab), while the Th17 response was qualified by increased IL-17A and IL-6 (Fig.  
203 5cde). Th2 responses were associated to increased levels in IL-4 and IL-5.

204 As expected, we observed an increased Th1 response in the WCV vaccinated NECre luc  
205 mice compared to the ACV group. We also observed an increase in the Th1 response in naïve  
206 challenged mice compared to non-challenged mice or the ACV group. Interestingly, the highest  
207 levels of IL-17 were observed in WCV NECre luc mice (Fig. 5c). The levels of Th2-associated  
208 cytokines, IL-4 and IL5 were similar between the WCV and ACV groups. (Supplementary Fig. 3).  
209 The lung cytokine profile from NECre luc mice immunized with RTX resembled a profile of naïve  
210 *B. pertussis* challenged mice with the exception of IL-6, which was lower in the RTX group. Taken  
211 together these data from the NECre luc mouse model corroborates previous findings by displaying  
212 a strong Th1/Th17 response in response to *B. pertussis* in WCV vaccinated mice.

213 **Characterizing the gene expression profiles of the lungs of immunized and naïve mice after**  
214 ***B. pertussis* challenge**

215 Current and past *B. pertussis* immune response studies have focused on a limited set of  
216 known immunological responses to *B. pertussis* challenge such as: bacterial burden, antibody  
217 response, recruitment of phagocytes, cytokine profiles, and others<sup>35,36</sup>. Whooping cough is a  
218 toxin-mediated disease, due mainly to the activity of pertussis and adenylate cyclase toxins.  
219 These toxins are released and affect a wide array of host cells<sup>4,25</sup>. It is therefore conceivable that  
220 *B. pertussis* infection would have a broader effect on the respiratory tissue beyond the induction  
221 of predictable immune response factors. To address this, we employed RNA sequencing  
222 (RNAseq) to observe the effect of *B. pertussis* challenge on the lungs of immunized and naïve  
223 NECre luc mice at a transcriptomic level. This allowed us to characterize the transcriptome  
224 response to infection and vaccine-induced responses. We hypothesized that regardless of the  
225 vaccine administered, we would identify a set of genes differentially regulated in all challenged  
226 mice. Additionally, we sought to discern the unique gene expression profiles in response to  
227 challenge in each immunized group.

228 To perform RNAseq analysis, lungs from NECre luc mice were harvested at an early time-  
229 point (day 1) following *B. pertussis* challenge and at a late time-point (day 6 or 9). RNA from the  
230 lungs of the mice was isolated. Libraries were prepared and sequenced on the Illumina HiSeq  
231 1500 platform. To characterize transcriptional responses to *B. pertussis* challenge in naïve or  
232 vaccine mice (ACV, WCV, RTX), we compared the challenged samples to control mice that were  
233 not immunized nor challenged. Based on this, we expected to determine both the immunological  
234 (innate and adaptive) and the non-immunological responses to *B. pertussis* challenge. We  
235 determined the differentially expressed genes (DEGs) for both early (day 1) and late (day 6 or 9  
236 depending on group) time-points. The total numbers of differentially regulated genes are shown  
237 in Fig. 6ac. Overall, there were more differentially genes at the later time-point than early after  
238 challenge (Fig. 6ac). At day 1 post-challenge, the WCV group had the most genes activated (Fig.  
239 6a, Supplementary Fig. 5). Of the genes that were upregulated at day 1 in the WCV, 29.7% were

240 not found upregulated in the other groups (464 of 1,560). At the late time-points, there were more  
241 common upregulated genes and only 14.1% of the genes were unique to the WCV. We found  
242 that 12.6% of unique upregulated genes (196) were common to all groups either challenged with  
243 *B. pertussis* following immunization or naïve challenge, suggesting that these genes were  
244 common to infection (Fig. 6b). At the later time-point, 19.8% of unique upregulated genes (867 of  
245 6,595) were shared by the WCV, ACV, RTX groups, while this number was much lower at the  
246 early time point (8.5% of DEGs, 133 of 1,560) (Fig. 6bd). Cumulatively, this data suggests that:  
247 1) WCV vaccination induces a more diverse early response to *B. pertussis* challenge due to the  
248 higher number of unique genes compared to other groups, and 2) at the later time-point all  
249 vaccinated groups have a more similar lung transcriptome.

250 Ingenuity Pathway Analysis (IPA) was performed to determine enrichment analyses of  
251 gene expression signatures in the context of each immunization. Using IPA Knowledge-based  
252 enrichment analysis, statistically significant genes were grouped into disease and function  
253 categories. A system of genes was considered enriched based on Fisher's exact test on the ratio  
254 of represented genes. At the early time-point we, observed that the largest changes were  
255 associated with genes involved in immune cell trafficking of the WCV group (Fig 7a). Genes with  
256 the highest fold changes within this system were associated with activation and migration of  
257 leukocytes (Fig. 7b). Additionally, we observed significant enrichment of genes associated with  
258 the humoral and cell-mediated immune responses (Fig. 7b). Pertussis toxin affects multiple  
259 aspects of the cardiovascular system such as blood pressure, leukocyte migration, etc<sup>7,37,38</sup>. In  
260 both naïve and immunized mice, we observed gene expression signatures related to  
261 cardiovascular diseases (Fig. 7ab). ACV immunization results in high amounts of anti-PT  
262 antibodies (Fig. 4d), and we observed fewer genes significantly altered in the ACV immunized  
263 mice, suggesting positive effects of anti-PT antibodies on neutralization of toxin activity. At the  
264 late time-point, immune cell trafficking gene expression seemed to decrease in naïve, ACV, and

265 RTX groups; however, the expression of these genes was still high in the WCV group. As  
266 expected, immune-related gene signatures dominated the responses to *B. pertussis* infection.  
267 However, thousands of genes significantly dysregulated due to infection at both time-points were  
268 not related to immune response or were not sufficiently characterized to be assigned a function.  
269 Analysis of the lung transcriptomes corroborated the findings of flow cytometry and cytokine  
270 profile analyses, further supporting that there is an increase in leukocyte activity in the respiratory  
271 tissue of WCV immunized mice compared to ACV or RTX immunized mice following *B. pertussis*  
272 challenge.

### 273 **Analysis of neutrophil-specific gene signatures**

274 Since we observed that neutrophils accumulate in the lung of WCV immunized NECre luc  
275 mice, we chose to delve further into the changes in expression of genes associated with neutrophil  
276 activity. To compare the neutrophil response between the groups, we selected genes with GO  
277 terms associated with neutrophil migration and activation and plotted the relative fold changes for  
278 this subset of genes for each immunization group (Fig. 8). The expression levels of these genes  
279 from either the naïve challenged, or immunized and challenged groups was compared to naïve,  
280 not infected control mice (Fig. 8).

281 *Cxcl2* is a chemokine produced by monocytes and neutrophils at sites of infection<sup>39</sup>.  
282 Previously it has been shown that convalescent mice previously challenged with *B. pertussis*  
283 express lower amounts of *cxcl2* when re-challenged with *B. pertussis* than naïve mice<sup>40</sup>. This  
284 suggests that the adaptive responses in these mice negate the need for the innate production of  
285 *Cxcl2*. Supporting this hypothesis, we observed the highest expression levels of *Cxcl2* in naïve  
286 and RTX immunized mice, which had similar bacterial burdens (Fig. 7bd and Fig. 8be). The  
287 induction of *Cxcl2* expression was lower in ACV vaccinated mice than naïve mice (Fig. 8ac). The  
288 expression of *Cxcl2* also increased in the WCV mice, but remained high at the late time-point

289 (Fig. 8b). Our serological analysis indicated that WCV immunization only induced minimal anti-  
290 PT production, whereas ACV induced high amounts of anti-PT (Fig. 3d). PT has been shown to  
291 induce production of Cxcl2 in TY10 cerebral endothelial cells which further suggests a causal  
292 relationship between non-neutralized PT and Cxcl2 production<sup>41</sup>.

293 All of the groups showed increases in a number of other C-X-C and C-C family chemokines  
294 (*cxcl3*, *cxcl1*, *ccl3*, *ccl4*, *ccl6*, and *ccl17*). *Cxcl1* gene expression was increased at day 1 in all  
295 groups compared to the non-infected control (Fig. 8). We also observed an increase in *IL-23*  
296 expression in the WCV group (Fig. 7b), which might be associated with the IL-17 cytokine  
297 response measured in the WCV lung tissue. Tumor necrosis factor (*tnf*) gene expression was  
298 increased in WCV, RTX, and ACV mice compared to non-infected mice. However, *Tnf* expression  
299 levels decreased in ACV mice and were lower than those observed in uninfected mice at day 9  
300 (Supplementary Fig. 4). Ross *et al.* demonstrated that IL-17A promotes production of CXCL1  
301 during *B. pertussis* challenge<sup>10</sup>. In our cytokine analysis, only the WCV mice had sufficient IL-17  
302 to be detected in the lung homogenates (Fig. 5c). Taken together these data suggest that although  
303 we did not observe high *IL-17A* gene expression in the transcriptome or in the IL-17 cytokine  
304 analysis, there could still be sufficient IL-17A in the Naïve, ACV, and RTX challenged mice that  
305 could account for the increased *Cxcl1* gene expression.

306 We observed that *S100a9* and *S100a8* were highly upregulated in WCV and RTX groups  
307 (Fig. 7 and Fig. 8b). *S100a9* is a major calcium-binding protein of neutrophils, which forms a  
308 heterodimer with *S100a8*, and promotes polymerization of microtubules. Interestingly, *S100a8/a9*  
309 is produced mainly by neutrophils and high plasma levels of *S100a8/a9* correlate with higher  
310 blood neutrophil blood levels in healthy human adults<sup>42</sup>. *S100a8/a9* promotes transendothelial  
311 phagocyte migration by promoting tubulin polymerization<sup>43</sup>. Additionally, monocytes isolated from  
312 human patients with cardiac injury have been found to be particularly responsive to *S100a8/a9*  
313 and secrete increased amounts of TNF- $\alpha$  and IL-6<sup>44</sup>. *S100a8/a9* can induce neutrophil

314 chemotaxis and adherence, but PT can block this function of S100a8/a9<sup>45</sup>. These data suggest  
315 that PT induction of leukocytosis may be related to the role of S100a8/a9 in leukocyte recruitment.  
316 S100a8/a9 expression was lowest in the ACV mice which had the highest amount of serum anti-  
317 PT.

318 Overall the WCV mice had higher expression of more neutrophil genes than any of the  
319 other groups (Fig. 7). Expression of these neutrophil signatures did not return to uninfected levels.  
320 These observations corroborates IVIS (Fig. 4de) and flow cytometry analyses (Fig. 4fg).  
321 Neutrophil gene expression in ACV mice was dynamic and returned to levels lower than  
322 uninfected mice by day 9. ACV mice did not have detectable *B. pertussis* in their lungs at day 9,  
323 indicating that the initial challenge does had been cleared (Fig. 3). ACV and WCV signatures  
324 were the most dissimilar, while the RTX and naïve mice transcriptome profiles were the most  
325 similar (Fig. 7). This correlates with the fact that RTX mice still have detectable *B. pertussis* in  
326 their nares, trachea and lungs at day 9 at levels similar to those observed in non-vaccinated mice.  
327 These data confirm our neutrophil observations but also enhance our analysis of the neutrophil  
328 dynamic in the context of vaccination status and *B. pertussis* challenge.

### 329 **B cell gene expression signatures in relation to immunization status.**

330 It has been established that B cells are required for the clearance of *B. pertussis* in mice  
331 and that ACV immunization protects through neutralizing antibodies<sup>46,47</sup>. To further investigate  
332 antibody production between WCV and ACV immunized mice, we aimed to determine the  
333 diversity of B cell clone expansion between vaccinated and non-vaccinated challenged mice.  
334 Using MiXCR software, the same illumina sequenced reads mentioned above were analyzed  
335 specifically for immunoglobulin profiling<sup>48</sup>. Individual B cell clones were identified by B cell  
336 receptor sequence and clonal expansion was accessed by immunoglobulin diversity and  
337 frequency between the vaccinated and challenged, naïve challenged, and non-challenged control

338 groups. At the early time-point day 1 post-challenge, immunoglobulin diversity and frequency of  
339 B cells depicted a close relation between the ACV and RTX vaccination groups, as also did WCV  
340 and naïve challenged mice (Supplementary Fig. 6a). This response shifted by the late time-point  
341 (days 6 or 9), when we observed that WCV and ACV groups were more similar. Using this  
342 approach, we were able to determine the individual variable and joining segments abundance,  
343 and the frequency of which a particular was found. Not surprisingly, we observed the highest  
344 degree of diversity at the late time-point. WCV and ACV were the most similar due to a higher  
345 number and abundance of clonotypes (Supplementary Fig. 6b). We focused our analysis on the  
346 diversity of the third complementarity-determining region (CDR3) of the heavy Ig chain, because  
347 this region has been shown to be necessary for antigen specificity<sup>49</sup>. The highest abundant CDR3  
348 region sequence, NQHLEW, was present only in the WCV immunized mice, while the other 10  
349 highest CDR3 regions were shared across vaccine groups at the early and late time-points  
350 (Supplementary Table 6 and Supplementary Table 7). Together this data suggests that clones  
351 generated from acellular based vaccines (ACT and RTX) are more closely related because they  
352 are generated to a limited number of antigens. However, by the late time-point, proliferation of  
353 specific B cell clones generated from WCV has created the same diversity seen in the ACV  
354 clones. The B cell clonotype analysis suggests that we can aim to further understand these  
355 populations in the future but we will need to increase our sequencing depth by directly isolating  
356 the cell populations from the immunized mice instead of analyzing the full lung tissue. It may also  
357 be interesting to probe the T cell receptor clonotypes using the same method.

## 358 Discussion

359 In this study, we compared the innate and adaptive immune responses of immunized  
360 NCRre luc mice vaccinated with ACV or WCV vaccines, to mice immunized with a truncated ACT  
361 toxin adsorbed to alum (RTX), or non-vaccinated naïve mice following challenge with *B. pertussis*.  
362 ACV and WCV immunized mice cleared *B. pertussis* challenge but distinctive immune responses

363 were observed. We also determined that the RTX antigen alone was not protective as a single  
364 antigen vaccine with alum adjuvant in NeCre luc mice. We utilized IVIS imaging to track the  
365 recruitment of neutrophils to the respiratory tract of challenged mice from days 1 to 9 post-  
366 challenge. The data obtained illustrated a dramatic increase in the amount of neutrophils recruited  
367 to the lungs and nasal cavity of WCV immunized mice compared to ACV immunized mice when  
368 followed by *B. pertussis* challenge. These data were also supported by flow cytometry and  
369 cytokine analysis. Furthermore, by performing RNA sequencing on the lung transcriptome during  
370 infection in vaccinated or naïve mice, we described unique gene expression profiles depending  
371 on the vaccination status of the mice. We also used RNA sequencing to begin to describe the  
372 immunoglobulin diversity induced by each vaccine.

373 Upon initial *B. pertussis* challenge, we observed activation of neutrophil associated genes in all  
374 groups, however it was only in the WCV immunized mice that we saw increased neutrophil genes  
375 expression still elevated at the late time-point. Neutrophilia and elevated neutrophil related genes  
376 expression at the late time-point, when bacterial numbers in the airways are greatly reduced,  
377 indicates either over activation of neutrophil “chemokine storm,” or possibly a lack of neutralization  
378 of bacterial toxins. Multiple studies suggest that PT is responsible for neutrophilia and  
379 leukocytosis following *B. pertussis* infection<sup>13,32,50,51</sup>. Immunization with the ACV induced 1,146-  
380 fold more anti-PT antibody production than WCV immunization at day 2 (Fig. 3d). It is possible  
381 that the low levels of anti-PT production in WCV mice resulted in insufficient neutralization of PT,  
382 resulting in exacerbated neutrophilia. Surprisingly, the highest neutrophil accumulation was  
383 determined at day 6 post-challenge when bacterial levels were similar to those of ACV protected  
384 mice (Fig. 3). These findings suggest that while WCV immunization is protective at clearing  
385 infection in NECre luc mice, it also induced severe neutrophilia. Interestingly, the neutrophil  
386 response in WCV mice decreased at days 2 and 4 but highly increased at day 6 (Fig. 4). At day  
387 2, we observed a significant increase in IL-17 in the lungs of WCV mice (Fig. 5c) that could result  
388 from the increased IL-17 expression in these mice. Stephen Morse observed dose-dependent



389 leukocytosis in mice following vaccination with killed *B. pertussis*<sup>31</sup>. In this study, NECre luc mice  
390 were immunized with 1/5<sup>th</sup> the human dose of WCV. We now realize that this dose is likely well  
391 above the proportional weight of a mouse compared to a human. It is possible that this high  
392 vaccine dose induced the hyper leukocytosis, similar to the dose-dependent increase that Morse  
393 observed. It is known that hyperleukocytosis is associated with death in infant cases, and that PT  
394 is responsible for inducing leukocytosis<sup>1,7,52</sup>. Furthermore, mice and baboons infected with *B.*  
395 *pertussis* and then treated with anti-PT antibodies had lower levels of leukocytosis compared to  
396 non-infected controls<sup>50</sup>. An epidemiological study found that in unvaccinated individuals with  
397 pertussis, 72% of patients experienced leukocytosis<sup>53</sup>. In this study, we observed that WCV  
398 immunized NECre luc mice experienced neutrophilia and morbidity, which highlights the potential  
399 issues of using WCVs. It would be interesting to determine the relationship of neutrophilia and  
400 WCV immunization in epidemiological past studies but we have not been successful in identifying  
401 a study that specifically looked at neutrophilia because studies most note general leukocytosis.

402 In NECre luc mice, the ACV was clearly more protective and less detrimental to the mice  
403 than the WCV. Truncated and full-length ACT purified from *B. pertussis* culture has been shown  
404 to be a protective antigen<sup>21</sup>. Wang *et al.* described the RTX region of ACT as highly immunogenic  
405 and easily purified as a recombinant protein<sup>22</sup>. We have observed that immunization of CD1 mice  
406 with RTX and alum adjuvant results in high anti-RTX titers (data not shown). Here, we immunized  
407 NECreluc mice with RTX and alum, but no protection was observed (Fig. 3abc). The previous  
408 studies were performed with strain 18323 and the antigen was directly isolated from *B.*  
409 *pertussis*<sup>21,54</sup>. It is now known that strain 18323, is an outlier compared to most other global *B.*  
410 *pertussis* strains and Guiso *et al.* noted that strain 18323 produces less PT than the Tohama I  
411 type strain. From our work, we know that UT25 produces more PT and ACT than Tohama I (data  
412 not shown). It is possible that due to the increased PT levels produced by UT25, vaccination with  
413 RTX was not sufficient to block colonization and proliferation *in vivo*. Although RTX immunization  
414 did not result in clearance of *B. pertussis* from NECre luc mice, we did observe a reduction in the

415 pro-inflammatory cytokine IL-6 in the RTX group compared to not vaccinated and WCV  
416 vaccinated and challenged mice (Fig. 5e). PT and ACT have both been shown to induce the  
417 production of IL-6 in human cell lines<sup>55,56</sup>. The anti-ACT antibodies generated by RTX vaccination  
418 may play a role in reducing the levels of IL-6 due to reducing the activity of ACT. We hypothesize  
419 that it is necessary to neutralize both PT and ACT to provide optimal protection and in future  
420 studies, we will test RTX as an antigen in a multivalent ACV containing PT antigen.

421 Using standard immunological analyses, we observed typical Th2 and Th1/17 responses  
422 in ACV and WCV immunized mice respectively. *B. pertussis* utilizes PT and ACT to facilitate  
423 survival in the host and most studies about the PT/ACT specific effects have been performed on cell  
424 cultures *in vitro*. Microarray analysis has been used to profile the lung transcriptome of mice  
425 challenged with *B. pertussis*<sup>40,57</sup>. Here, we sought to use RNAseq to investigate the overall gene  
426 expression profiles of the murine lung in response to *B. pertussis* challenge. Analysis of the lung  
427 transcriptome 1 day after *B. pertussis* challenge exhibited a distinct profile in mice vaccinated  
428 with WCV compared to ACV, RTX, or naïve infected mice. This response was consistent with our  
429 WCV cytokine profile demonstrating a strong pro-inflammatory response. Similarly, transcriptome  
430 data from others during early *B. pertussis* infection noted an increase in chemokines such as  
431 Cxcl2, Cxcl10, Cxcl3, Ccl3, Cxcl1, and Ccl4<sup>57,58</sup>. In Raeven *et al*, convalescent mice previously  
432 infected with *B. pertussis* exhibited higher expression of these chemokines compared to naïve  
433 mice, similar to our whole cell transcriptome where these chemokines are consistently higher than  
434 the naïve mice (Fig. 7 and Fig. 8). We observed the highest expression of these chemokines in  
435 the naïve and RTX mice groups, where these groups had a similar gene profile of genes belonging  
436 to the immune cell trafficking and cardiovascular disease annotations (Fig. 7). These findings,  
437 along with higher bacterial burden (Fig. 3) suggest that RTX-alum immunization does not provide  
438 sufficient protection.

439 Our overall transcriptomic profiling revealed thousands of significant gene expression  
440 changes (Fig. 6). After analyzing the neutrophil (Fig. 8), and innate gene changes (Supplementary

441 Fig. 4), we then sought to specifically characterize B cell clone diversity. The RNAseq reads were  
442 re-processed with the MiXCR algorithm and we analyzed the abundance and diversity of VDJ  
443 clonotypes (Supplementary Fig 5). Besides the T cell response differences of the ACV and WCV  
444 (Th2 v. Th1/Th17) another significant difference between these two vaccines is the number of  
445 antigens. ACVs have 3-5 antigens (PT, FHA, PRN, FIM2/3) but the WCV hypothetically has  
446 ~3,000 antigens. In light of this, it would be logical to hypothesize that the WCV would induce a  
447 vast antibody repertoire as measured by many VDJ clonotypes. However, we observed a greater  
448 diversity and abundance in the ACV group compared to the WCV at both early and late time-  
449 points (Supplementary Fig. S6). It is important to point out that this analysis was performed on  
450 total lung RNA. If we were to isolate B cells and sequence deeper we would expect to more  
451 thoroughly characterize the repertoire. These data are interesting but we do not know which clone  
452 types result in functional antibodies that protect against *B. pertussis*. Further analysis is required  
453 to bridge the gap between clonotypes and functional/protective antibodies.

454 Using NeCRE luc mice, we performed tracking neutrophil recruitment during a *B. pertussis*  
455 respiratory infection. These data demonstrate how analysis of cellular responses through *in vivo*  
456 imaging can be used to provide a quantitative parameter throughout a study. This model can be  
457 applied to other bacterial infection models or cancer tumor progression models where following  
458 the same mouse throughout a study would be beneficial. In this study, we also added next  
459 generation sequencing technology to expand upon the immunological findings. RNAseq analysis  
460 can be further employed to understand key cell populations and how they are impacted by both  
461 immunization and *B. pertussis* challenge. Our current goal is to continue to refine the murine  
462 challenge models with new technological approaches in order to facilitate formulation of new  
463 pertussis vaccines. The findings of this study suggest that by integrating RNAseq analysis with  
464 classic immunological techniques, it is possible to illuminate novel intricacies of vaccine induced  
465 immunity to *B. pertussis*.

## 466 **Methods**

### 467 **Bacteria and culture conditions**

468 *B. pertussis* strain UT25 (UT25Sm1) were cultured on Bordet-Gengou (BG) agar (1906)  
469 supplemented with 15% defibrinated sheep blood (Hemostat Laboratories) for 48 h at 36°C<sup>59</sup>. *B.*  
470 *pertussis* was then transferred from BG plates to three flasks of 12 ml of modified Stainer-Scholte  
471 liquid medium (SSM)<sup>60</sup>. SSM cultures were not supplemented with cyclodextrin (Heptakis(2,6-di-  
472 O-methyl)- $\beta$ -cyclodextrin). SSM cultures were grown for ~22 h at 36°C with shaking at 180 rpm  
473 until the OD<sub>600</sub> reached 0.5 on a 1 cm path width spectrophotometer (Beckman Coulter DU 530).  
474 The cultures were then diluted to 1 x 10<sup>9</sup>/ ml with SSM.

### 475 **Mouse Strains**

476 All mouse strains used were bred in a specific pathogen-free experimental conditions within the  
477 Office of Laboratory Animal Resources vivarium at West Virginia University. Mice were aged 8 –  
478 12 weeks, male and female sex mice were equally assigned to all vaccination groups. 129-  
479 Elane<sup>tm1(cre)Roes</sup>/H mice (Medical Research Council, London, UK) were crossed with  
480 FVB.129S6(B6)-Gt(ROSA)26Sortm1(luc)kael/J mice (Jackson labs; 0051225) resulting in NECre  
481 luc progeny. NECre luc mice were injected with CycLuc 1 luciferin (EMD Millipore, Darmstadt,  
482 Germany) and confirmed to be luminescent using Xenogen Lumina II<sup>61</sup>. Upon intraperitoneal  
483 injection of a luciferase substrate (luciferin), neutrophils emit luminescence that is detectable  
484 using a high sensitivity live animal imaging system (Xenogen IVIS Lumina II).

### 485 **Vaccines used in study and administration**

486 All vaccines were formulated into 200  $\mu$ l doses with the antigen content described below. 100  $\mu$ l  
487 of INFANRIX (GSK) human vaccine (DTaP) which is 1/5 human dose of the vaccine, was mixed  
488 in 100  $\mu$ l of PBS. The NIBSC WHO standard *Bordetella pertussis* whole-cell vaccine (NIBSC code  
489 94/532) was received lyophilized and reconstituted in 1ml of PBS. At this concentration one

490 human dose is 100  $\mu$ l therefore, 20  $\mu$ l was mixed with 180  $\mu$ l of PBS, which is 1/5 of the human  
491 dose (66  $\mu$ g of total protein). A truncated ACT protein (RTX) was purified as previously described  
492 <sup>22</sup> 5.6  $\mu$ g of RTX was combined with 100  $\mu$ l alum adjuvant (Alhydrogel®, InvivoGen) corresponding  
493 to 1 mg of aluminum hydroxide. All immunizations occurred by intraperitoneal injection.  
494 Unvaccinated mice received 200  $\mu$ l of sterile PBS.

#### 495 **Vaccination and Challenge with *Bordetella pertussis***

496 NCRre luc mice were bred to ages ranging from (8-12 weeks). Mice were vaccinated at day 0,  
497 and then boosted 21 days later. Thirty-five days post initial vaccination, *B. pertussis* UT25 was  
498 grown as described above, and provided as a challenge dose at  $2 \times 10^7$  CFU in 20  $\mu$ l. Mice were  
499 anesthetized by intraperitoneal injection of 200  $\mu$ l of ketamine (6.7 mg/ml) and xylazine (1.3  
500 mg/ml) in 0.9% saline. Two 10  $\mu$ l doses of bacteria were administered through nasal inhalation  
501 into each nostril of the mouse. Mice from each of the groups were challenged WCV (8), ACV (8),  
502 RTX (6), and naïve control (PBS injection) (5).

#### 503 **Collection of murine samples and determination of bacterial burden**

504 On days 1,2,4,6, and 9 pc, mice were euthanized by intraperitoneal injection of pentobarbital and  
505 dissected in a biosafety cabinet under BSL-2 conditions. Blood was collected by cardiac puncture,  
506 serum was separated by centrifugation through a BD Microtainer SST blood collector (BD), or  
507 blood for complete blood cell counts were collected in BD Microtainer Tubes with K<sub>2</sub>EDTA (BD).  
508 Trachea and lungs were removed, placed in 1 ml PBS, and then homogenized. Trachea tissue  
509 was homogenized by a Brinkman Homogenizer (Polytron), while lung tissue was dissociated  
510 using a Dounce homogenizer (Kimble Chase). To determine viable *B. pertussis* in the nares, 1 ml  
511 of PBS was flushed through the nares and collected. In order to determine bacterial burden 100  
512  $\mu$ l of homogenate or nasal lavage was serial diluted in sterile PBS. Four 10  $\mu$ l aliquots of each  
513 serial dilutions were plated on BG containing streptomycin (100  $\mu$ g/ml) to ensure only UT25 *B.*

514 *pertussis* grew on the plates. After 72 h at 36°C colony forming units (CFUs) were counted and  
515 the bacterial burden per tissue was calculated. Due to the serial dilutions plated our limit of  
516 detection was 10<sup>3</sup> CFUs per ml or organ. CFUs from experimental groups at each time-point were  
517 compared to the naive (PBS injected) and challenged group by a two-tailed unpaired t test using  
518 the software package Prism 7 (GraphPad, La Jolla, CA). All experiments were performed in  
519 accordance with the National Institutes of Health Guide for the Care and Use of Laboratory  
520 Animals. All murine infection experiments were performed per protocols approved by the West  
521 Virginia University Institutional Animal Care and Use Committee (protocol number Damron 14-  
522 1211).

### 523 **IVIS imaging**

524 NECre luc mice received 83 mg/kg of CycLuc1 luciferin by IP injection (100 µl). Five minutes after  
525 injection mice were anesthetized with 3% isoflurane, mixed with oxygen from the XGI-8 gas  
526 anesthesia system supplied with a Xenogen IVIS Lumina II. Luminescent signals were acquired  
527 during a five-minute exposure. Acquisition was performed using Living Image 2.5 software  
528 (Xenogen). Images were acquired with a binning of 4. Following imaging, mice were either  
529 euthanized for dissection and extraction of tissue samples or returned to the vivarium.  
530 Luminescence was determined by quantification of photons emitted per second generated in each  
531 region of interest (ROI): whole mouse image or nasal cavity. The background of each image was  
532 subtracted from the ROI, background photons were defined by the average of two ROIs away  
533 from the mouse, for the same image. Data was expressed as relative fold change between target  
534 ROIs from experimental groups to an average of ROIs from control mice that were not vaccinated  
535 or challenged. Group comparisons were analyzed by one-way analysis of variance (ANOVA)  
536 followed by a Tukey's multiple-comparison test using Prism 7.

### 537 **Preparation of tissue and flow cytometry analysis**

538 Blood, lung, and cells isolated from nasal lavage were analyzed by flow cytometry. A 100  $\mu$ l  
539 sample was removed from lung homogenate of all samples and filtered through a 70  $\mu$ m cell  
540 strainer, then centrifuged at 1000 x g for 5 mins to pellet cells. Supernatant was removed, and  
541 RBC lysis buffer (BD Pharm lysis) added incubated at 37°C for 2 min, then pelleted using the  
542 same centrifugation conditions. Cells were resuspended in 500  $\mu$ l of PBS + 1% FBS, 100 $\mu$ l was  
543 aliquoted for antibody staining. After cardiac puncture blood was placed in EDTA containing tube  
544 (BD Bioscience), RBC were lysed using Pharmlyse (BD Biosciences) with a 15 min room  
545 temperature incubation and then prepared in a similar manner to other tissues. All cell suspension  
546 samples were incubated on ice in PBS and 1% FBS for blocking. Antibodies against specific cell  
547 surface markers: PE-conjugated GR-1 (BD, 553128) Alexa Fluor 700-conjugated CD11b  
548 (Biolegend, 101222) were added to cell suspensions and incubated in the dark for 1 h at 4°C.  
549 Lung, blood, and nasal wash suspensions were pelleted, and resuspended in PBS prior to  
550 analysis. Samples were read using LSR Fortessa (BD), and analyzed using FlowJo v10 (FlowJo,  
551 LLC). PMNs were classified as CD11b<sup>+</sup>Gr-1<sup>+</sup> single, live cells.

## 552 **Cytokine Quantification**

553 Lung homogenates were pelleted by centrifugation and then supernatant was collected and  
554 stored at -80°C until analysis. Concentration of cytokines in the lungs of vaccinated and  
555 challenged mice were determined by quantitative sandwich immunoassays, Meso Scale  
556 Discovery (Rockville, MD) V-PLEX Proinflammatory Panel (K15048G-1) and Mouse IL-17 Ultra-  
557 Sensitive kits (K152ATC-1), following manufacturer's instructions. Data was analyzed by one-way  
558 ANOVA, with a Tukey's multiple-comparison test for each time-point.

## 559 **Serology**

560 Vaccinated and challenged mouse serological responses to RTX, and PT were determined by  
561 qualitative ELISA. High-binding 96-well ELISA plates were coated overnight at 4°C with 50  $\mu$ l of

562 purified RTX or Pt in PBS at a concentration of 1  $\mu\text{g}/\text{mL}$ . Purified *B. pertussis* antigens, were  
563 obtained from Dr. Jennifer Maynard. Serum samples from NVNC, PBS, ACV, and WCV serum  
564 titers were analyzed for PT, as the RTX group had no PT in vaccine. Samples from NVNC, PBS,  
565 WCV, and RTX were analyzed for serum antibody titers to RTX, as ACV would not be expected  
566 to have RTX titers because no RTX was included in vaccine. Plates were then washed with PBS  
567 + 1% Tween 20 (PBS-T), then blocked with 5% milk in PBS-T for 1 hour at room temperature.  
568 Sera were diluted to a concentration in the linear dose range for each antigen. Plates were  
569 incubated for 2 h at 37°C with serial diluted serum samples from vaccinated groups. Following 3  
570 PBS-T washes, 1:4000 goat anti-mouse IgG-AP (Southern Biotech), secondary antibody was  
571 added and incubated 1 h at 37°C. Plates were washed, then developed for 30 min with 100  $\mu\text{l}$  p-  
572 nitrophenyl phosphate. Colorimetric signal was measured using Spectramax i3 (Molecular  
573 Devices) at 450nm. An average of blanks was subtracted from all absorbances and used as a  
574 baseline detection limit. The minimum detection limit above the baseline was analyzed by one-  
575 way ANOVA, with a Tukey's multiple-comparison test for each time-point using Prism 7.

#### 576 **Isolation of Lung RNA, illumina library preparation, and sequencing**

577 Lung RNA was prepared similar to previously reported<sup>62</sup> with the following modifications. The  
578 freshly isolated NECre luc mice lungs were homogenized and RNA was prepared immediately  
579 using RNeasy purification kit (Qiagen). Each lung was placed in 1 ml of sterile PBS and then 2 ml  
580 of TE lysozyme (1mg/ml) was added and allowed to incubate for 10 min on ice. 2 ml of RLT buffer  
581 was added and incubated for another 10 min on ice. The homogenate was then pushed through  
582 a syringe needle. The homogenates were pelleted by centrifugation at 20,800g (max speed  
583 microfuge) for 10 min. The supernatant was extracted and then 2.8ml of 100% EtOH was added  
584 to each tube. This supernatant of each mouse sample was then disturbed to four RNeasy tubes  
585 for RNA isolation. The RNA was eluted and pooled into one sample per mouse. The resulting  
586 RNA was quantified on a Qubit 3.0 (ThermoFisher) with the high intensity assay kit. Next, the



587 RNA integrity was assessed using Agilent BioAnalyzer RNA Pico chip. All samples were then  
588 submitted Ribo-zero rRNA depletion (illumina) and reassessed for RNA integrity. rRNA depleted  
589 mRNA samples were then fragmented and prepared into libraries using illumina ScriptSeq  
590 Complete Gold (Epidemiology). Libraries were checked for quality control with KAPA qPCR QC  
591 assay (KAPA Biosystems). The libraries (33 total) were then sequenced on an illumina HiSeq at  
592 the Marshall University Genomics Core facility on 2 lanes of 2x50B. *pertussis*. Sequencing data  
593 were deposited to the Sequence Read Archive (SRA) and are available under the reference  
594 number SRA587785, BioProject number PPJNA394758.

### 595 **RNAseq bioinformatics analyses**

596 The reads were analyzed using the software CLC Genomics workbench 9.5. *Mus musculus*  
597 genome was downloaded from NCBI (version GRCm38.78). Reads were mapped against the  
598 genome using the following settings for mapping: mismatch cost = 2, insertion cost = 3, deletion  
599 cost = 3, length fraction = 0.8, similarity fraction = 0.8. RPKM values were generated using default  
600 parameters for CLC Genomics. On average ~20 million reads were obtained for each sample and  
601 with stringent parameters ~73% mapped to the murine genome with our mapping parameters.  
602 Fold changes in gene expression and statistical analyses were performed using an Extraction of  
603 Differential Gene Expression (EDGE) test p value. Expression data for each gene was considered  
604 significant if the p value was less than 0.05. Venn diagrams were generated using Venny 2.1<sup>63</sup>.  
605 Fold-change of gene expression data was plotted relative to non-challenged control groups at  
606 each time-point. Supplementary Table 8 contains the exported gene expression analysis  
607 worksheets and statistical analyses. Gene list were created using GO terms acquired though  
608 AmiGO 2 database including neutrophil (CL:000075), neutrophil activation (GO:0042119),  
609 neutrophil migration (GO:1990266), innate immune response (GO: 0045087), T-helper 1 type  
610 immune response (GO:0042088), type 2 immune response (GO:0042092), and T-helper 17 type  
611 immune response (GO:0072538)<sup>64</sup>.

## 612 **Pathway Enrichment Analysis**

613 Ingenuity Pathway Analysis (Qiagen) was utilized to map lung transcriptomes to biological and  
614 disease functions. Lung transcriptomes were loaded to IPA, and comparative analyses were  
615 performed at early and late time-points. Gene expression fold-changes were mapped to higher-  
616 order disease and function defined by the IPA knowledge base, and a gene enrichment analysis  
617 was performed on early and late time-points. A Fisher Exact T-test was used to determine  
618 statistically significant ( $p < 0.05$ ) p-values of the functions that made up the higher-order disease  
619 category and represented as a range of p-values. The relative fold-change of these identified  
620 genes was determined, and the 10 highest fold-changes were represented as heat maps.

621

## 622 **Immunoglobulin and T-cell receptor profiling**

623 B cell clones were identified using MiXCR software (MiLaboratory), capable of generating  
624 quantitated clonotypes of immunoglobulins<sup>48</sup>. The same paired-end Illumina sequenced reads  
625 mentioned above were merged using concatenation, then imported into MiXCR software. Merged  
626 reads were aligned to each other to generate clonotypes of based on VDJ segment regions of  
627 unique immunoglobins specific to each sample. Clone data for each sample was grouped based  
628 on vaccine received, and time-point. Clonotypes from each sample were then separated into T  
629 and B cells, based on T-cell receptor or B-cell receptor specific sequences. Prepared data files  
630 were then imported into VDJtools (MiLaboratory), for data representation according to established  
631 protocol<sup>65</sup>. Briefly, data was represented to show V-J diversity, and quantify unique clonotypes  
632 using dendrograms and chord diagrams.

633

634

635

636

637 **Acknowledgements**

638 *B. pertussis* strain UT25 was kindly provided by Dr. Sandra Armstrong (University of Minnesota).  
639 The NeCre luc mice were developed by Ian Glomski and we thank him for originally providing the  
640 mice and developing the imaging methodologies. The Elane mice were kindly provided by MRC  
641 Harwell (Oxfordshire, UK). RTX antigen was graciously purified by Andrea DiVenere, University  
642 of Texas at Austin. We would like to thank the following WVU facilities: Genomics Core, Office of  
643 Laboratory Animal Resources (OLAR) for support with the murine studies, Animal Models and  
644 Imaging (U54 GM104942) for support IVIS imaging, the flow cytometry and single cell (S10  
645 OD016165). We would like to acknowledge Kathy Brundage for flow cytometry support, Sarah  
646 McLaughlin for IVIS support and Ryan Percifield for next generation sequencing library  
647 preparation. D.T.B. was supported by the WVU HSC Office of Research and Graduate Education,  
648 graduate student fellowship from the West Virginia NASA Space Grant Consortium, and the  
649 Jennifer Gossling Fellowship. Mackenna Boone was supported by a WV-InBRE summer  
650 fellowship. Additional support was provided by NIH/NIAID grant RO1 AI1018000 (E.L.H.) and  
651 NIH/NIAID grant RO1 A1122753 (J.A.M). This work was also supported by funding from National  
652 Institutes of Health HHSN272201200005C-416476 and laboratory startup funds from West  
653 Virginia University to F.H.D. The Marshall University CORE facilities and RNA sequencing were  
654 funded by the WV InBRE grant P20 GM103434.

655

656 **Author contributions**

657 All authors participated in the composition and review of the manuscript. D.T.B. designed  
658 experiments, performed IVIS imaging, raised and dissected mice, analyzed immunological data,  
659 mapped NGS read data and calculated expression analysis. M.E.V. developed flow cytometry  
660 panels, and performed analyses. T.W. coordinated murine trials, and prepared RNA for NGS  
661 analysis. E.S.N. and E.S.K. analyzed RNAseq and developed visualizations. J.M.H. performed  
662 serological analysis. C.E., M.B., S.B., K.D., J.B., and M.E prepared and analyzed samples to

663 measure correlates of protection on each experimental day. J.M. provided the RTX antigen. J.M.,  
664 E.L.H, M.B. and F.H.D. designed the overall strategy of the studies. M.B. and F.H.D. formulated  
665 vaccines, directed experiment days, performed dissections, and analyzed RNAseq data.

666 **Competing financial interests**

667 The authors declare no competing financial interests.

668 **Supplemental Information**

669 Supplemental information is available under Boehm et al Supplemental Information.

670

671

672

673

674

675

676

Figure 1

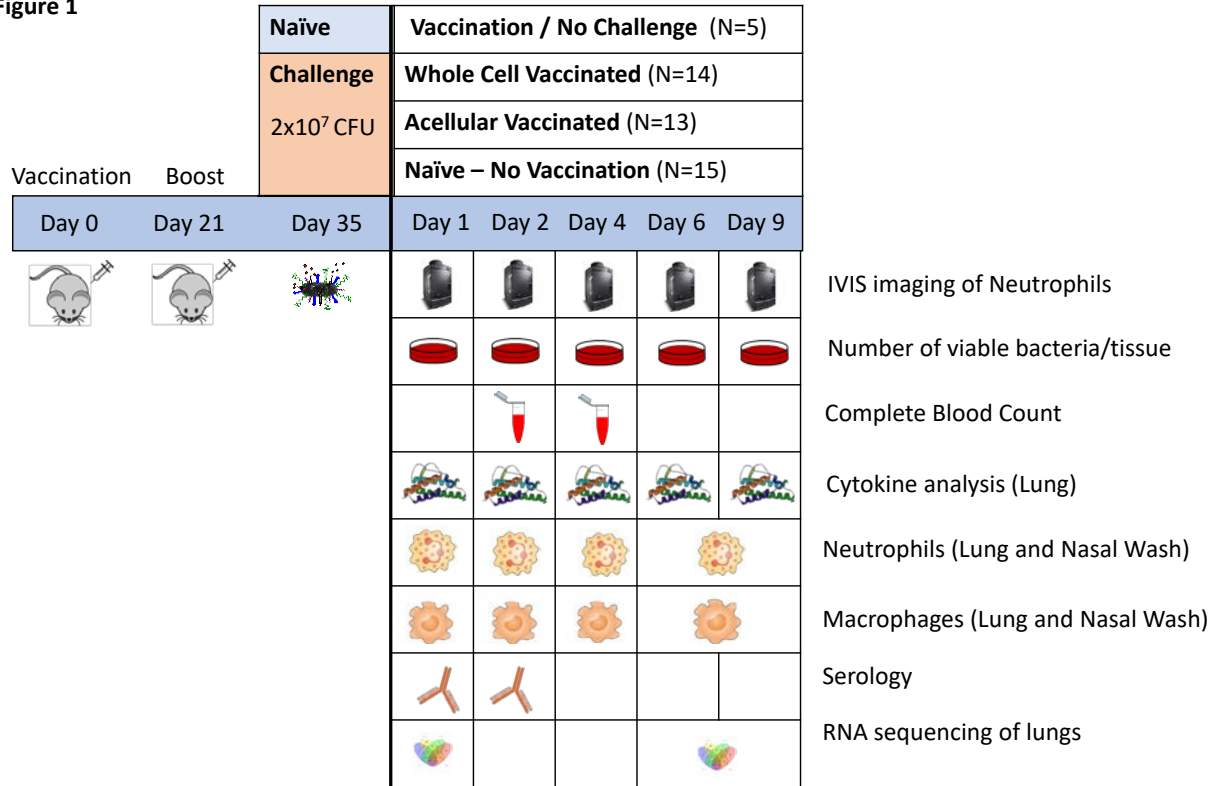

677

678 **Figure 1: Experimental workflow for vaccination, *B. pertussis* challenge, sample**  
 679 **acquisition, and analysis of this study.** Schematic diagram of experimental design showing  
 680 vaccination schedule, immunization groups, *B. pertussis* challenge, euthanasia, sampling, and  
 681 analysis method on days 1,2,4, 6, and 9 days pc in NECre luc mouse model. Mice were initially  
 682 vaccinated and then given a booster dose of the same vaccine at day 21. A challenge dose of 2  
 683 x 10<sup>7</sup> viable bacteria was administered by intranasal inhalation at day 35. IVIS imaging of  
 684 neutrophils was monitored throughout study. The overall numbers of mice per group are indicated.  
 685 At time-points shown bacterial burden, complete blood cell counts, lung cytokine profiles, lung  
 686 and nasal wash neutrophil cells, serum antibody titers, and lung transcriptome were determined.  
 687 To characterize the effects of vaccination, the vaccinated groups were compared to a group of  
 688 not vaccinated and not challenged controls.

689

690

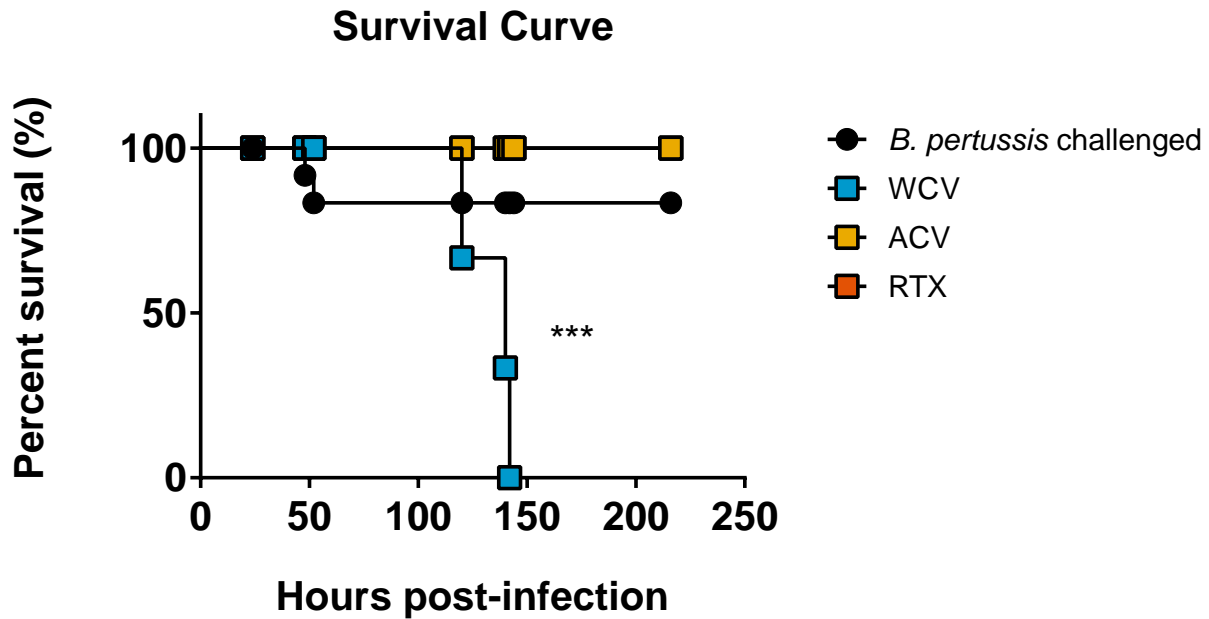

691

692 **Figure 2: Kaplan- Meier survival curves of NECre luc mice according to immunization**

693 **group.** The survival percentage of remaining NECre luc mice (prior to scheduled euthanasia)

694 immunized with WCV, ACV, RTX, and *B. pertussis* challenged, or not vaccinated and challenged

695 with *B. pertussis*. Log-rank (Mantel-Cox) test: \*\*\* $p < 0.0005$ . In Fig. 1 the time-points where mice

696 were euthanized for analysis are indicated. In this survival curve, we are only showing the mice

697 became morbid throughout the study timeframe.

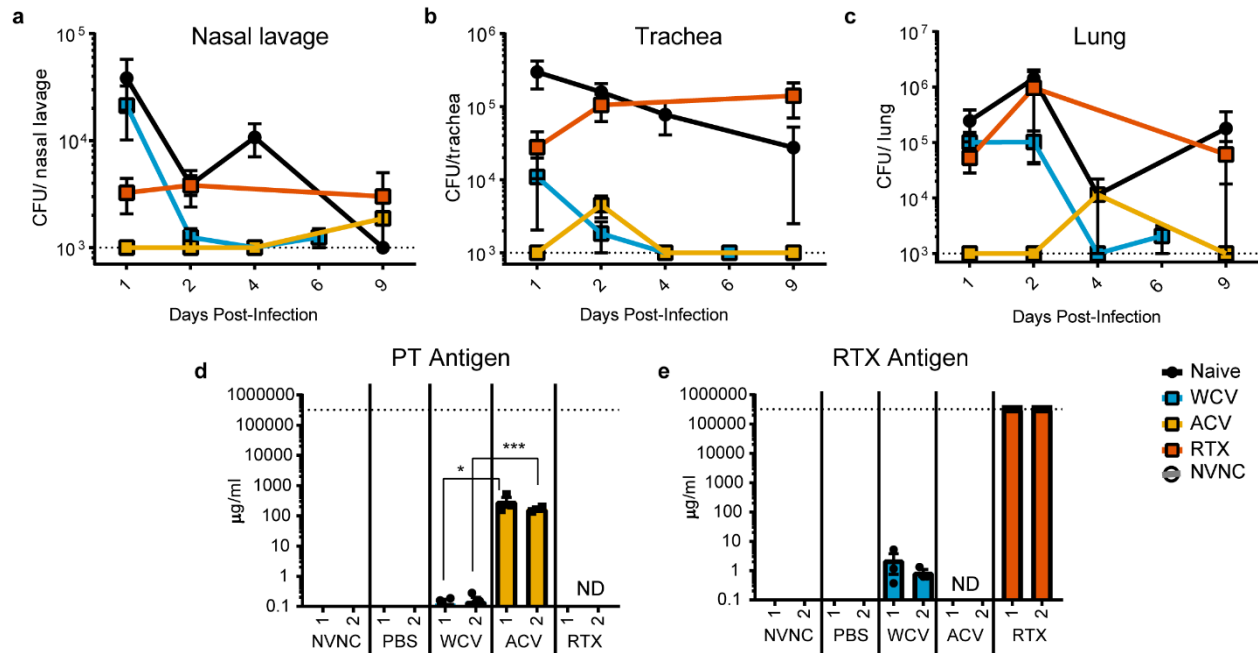

698

699 **Figure 3: Bacterial burden in respiratory tissue and serological responses to *B. pertussis***

700 **challenge of immunized and naïve NCRre luc mice.** Mice were vaccinated with PBS control

701 vehicle, WCV, ACV, or RTX then *B. pertussis* challenged. At days 1,2,4,6 and 9 pc the bacterial

702 burdens were determined by culturing of (A) nasal lavage, homogenates of (B) trachea and (C)

703 lung on BG agar. The dashed line at 1000 CFUs represents the lower limit of detection, due to

704 plating. Data in each group were compared to PBS control using an unpaired two-tailed t-test.

705 Significant differences are not indicated on the graphs for clarity (Supplementary Table 2 indicates

706 all statistics performed).

707

708

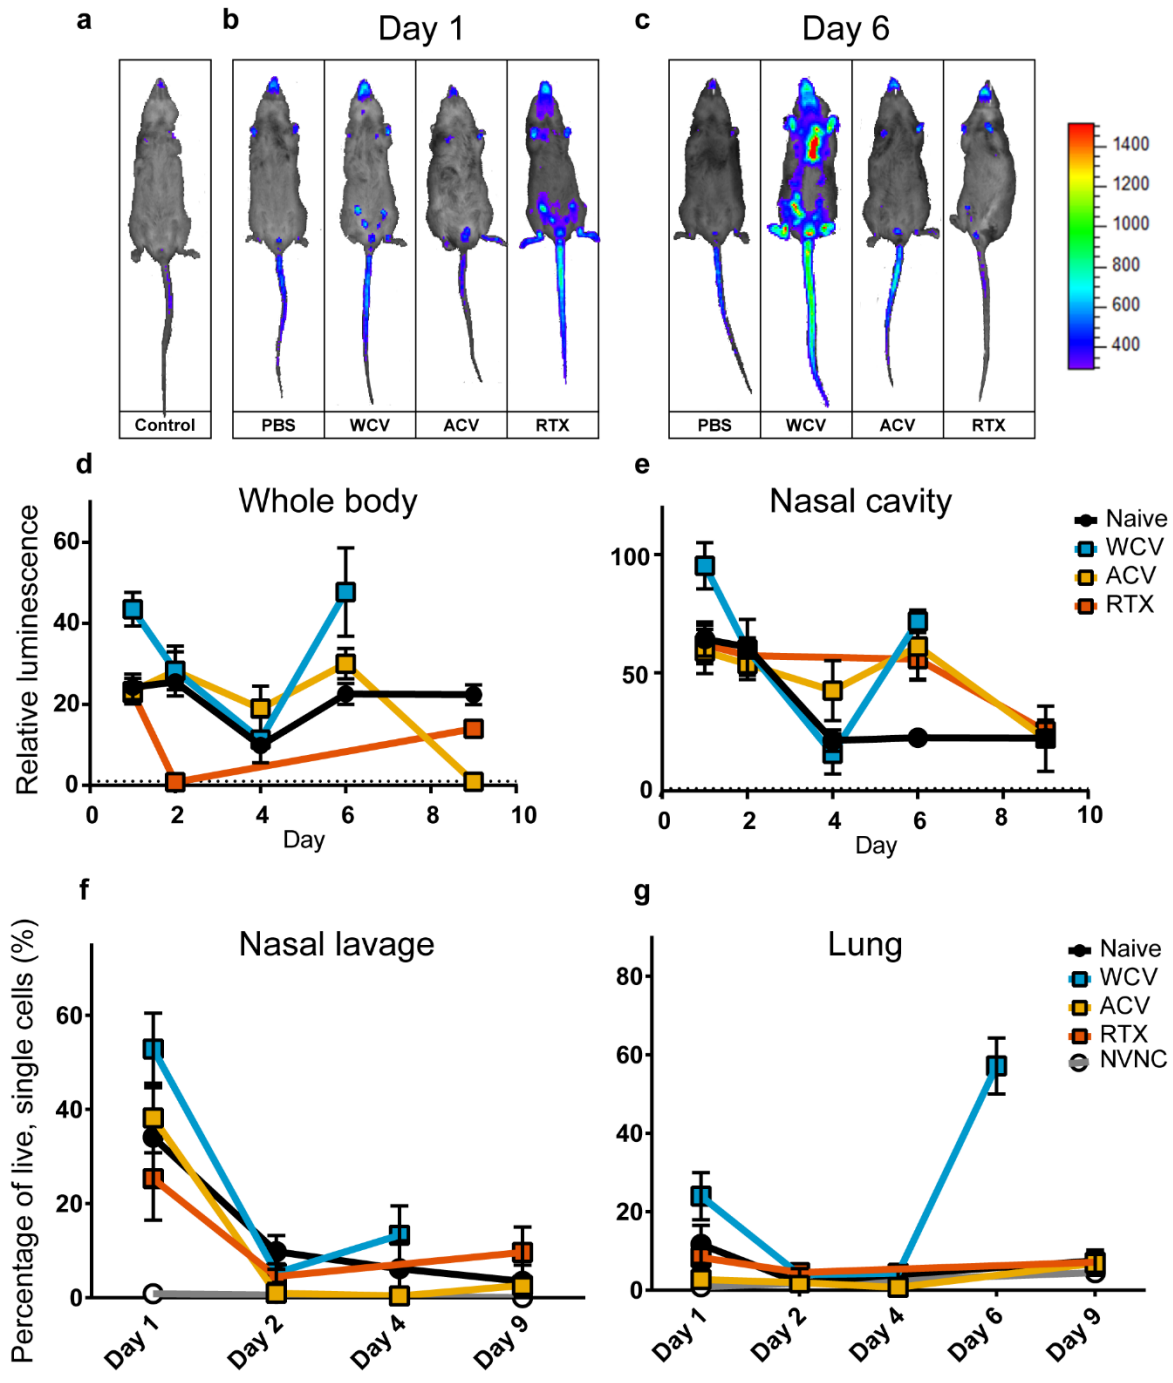

709

710 **Figure 4: IVIS imaging and flow cytometric analysis of naïve and immunized NCR luc**

711 **mice post challenge with *B. pertussis*. IVIS imaging of luminescent neutrophils in**

712 **anesthetized mice following luciferin injection. (A) Representative images of naïve, not *B.***

713 ***pertussis* challenged NCR luc mice. (B) Representative images of PBS control, WCV, ACV, and**

714 **RTX immunized and *B. pertussis* challenged NCR luc mice at day 1 pc and (C) day 6 pc (D and**



715 E). Luminescence was measured on Xenogen IVIS Lumina II. Relative luminescence levels  
716 quantified by fold change of emitted photons/second of NECre luc mice following *B. pertussis*  
717 challenge (N=3-5) compared to average luminescence of naïve, not challenged NECre luc mice  
718 (N=5). Neutrophil luminescence of (D) whole animal signal and (E) nasal cavity was determined  
719 at days 1,2,4,6, and 9 pc. (f) Quantification of the percentage of live, single cells classified as  
720 neutrophils (GR-1+CD11b+) detected in nasal lavage (f) and lung homogenate (g). Significant  
721 differences are not indicated on the graphs for clarity, but are included in Supplementary Table 3.

722

723

724

725

726

727

728

729

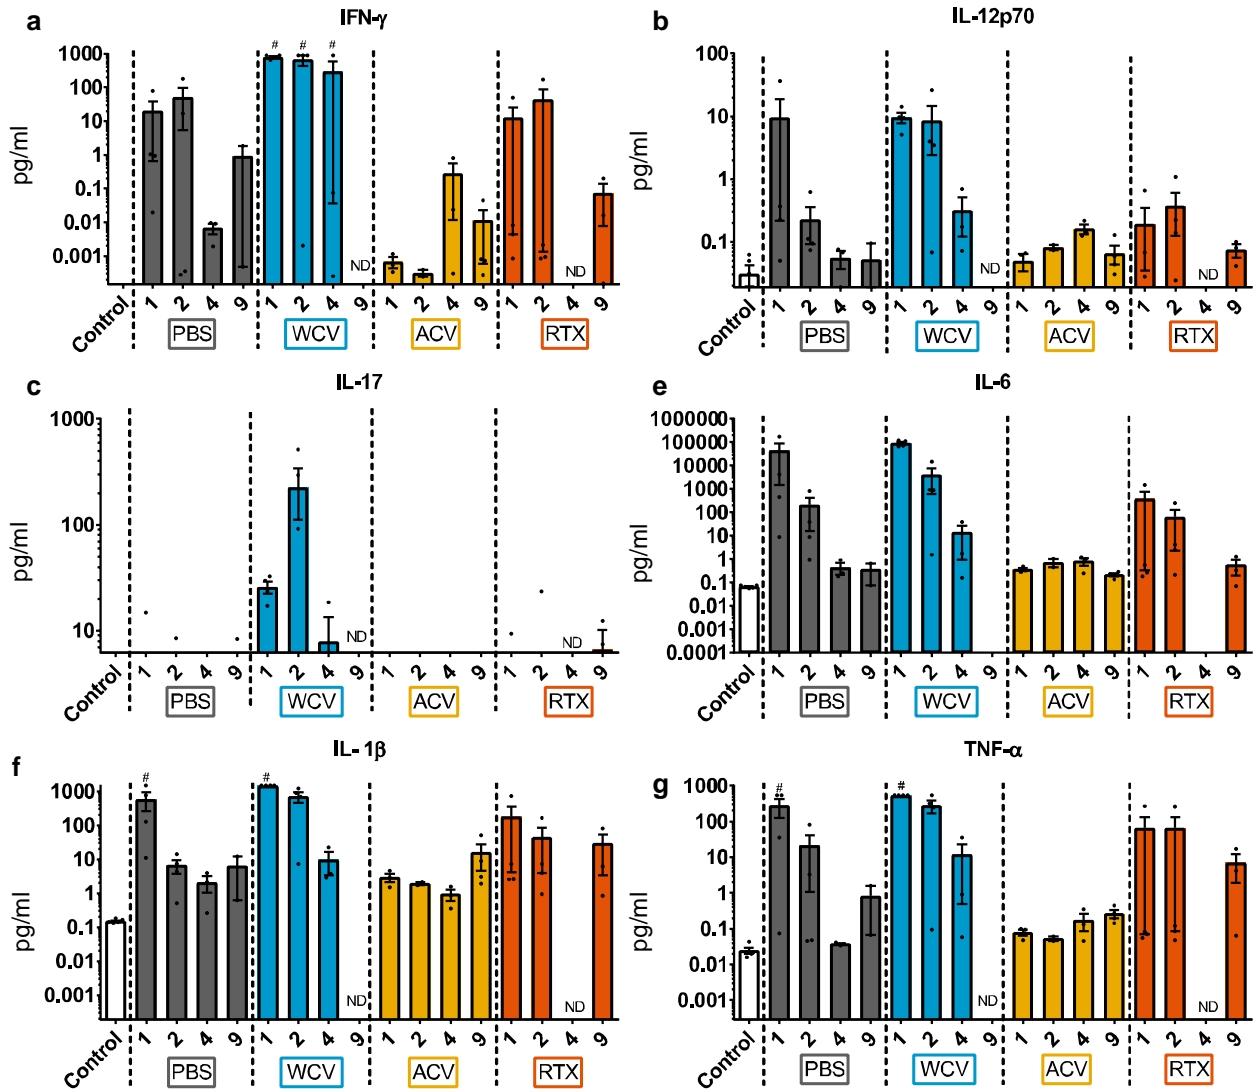

730

731 **Figure 5: Analysis of cytokine profiles from lungs of naïve and immunized NCR luc mice**

732 **post challenge with *B. pertussis*.** Th1 associated cytokines from the supernatant of lung

733 homogenates were analyzed at days 1,2,4 and 9 pc. Cytokines (a) IFN-γ, (b) IL-12p70, (c) IL-17,

734 (d) IL-6, (e) IL-1β, (f) TNF-α were quantified using electrochemiluminescence immunoassays.

735 Significant differences are not indicated on the graphs for clarity but, are included in

736 Supplementary Table 4. ND: Sample not determine, #: data above upper limits of detection

737

738

739

## EARLY

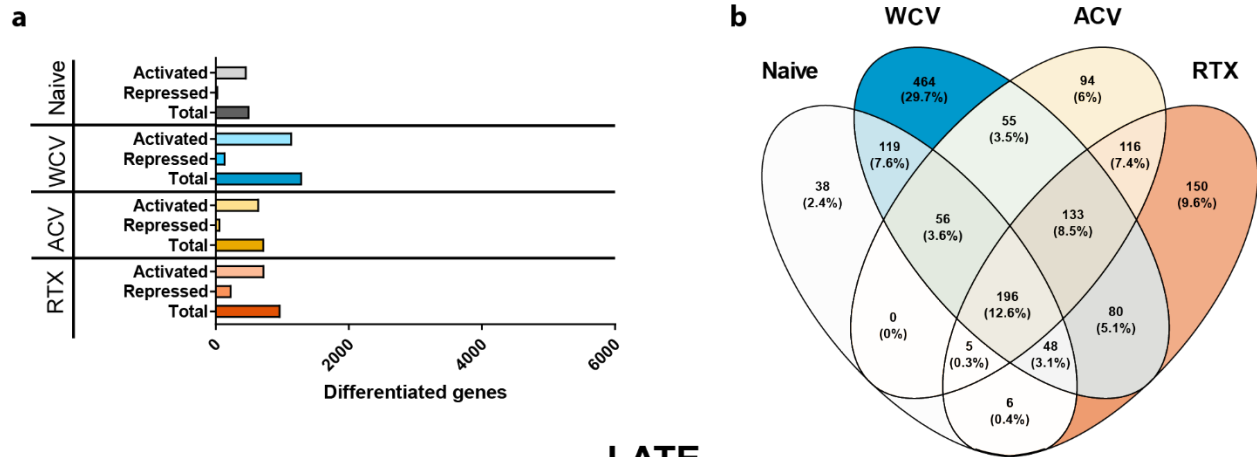

## LATE

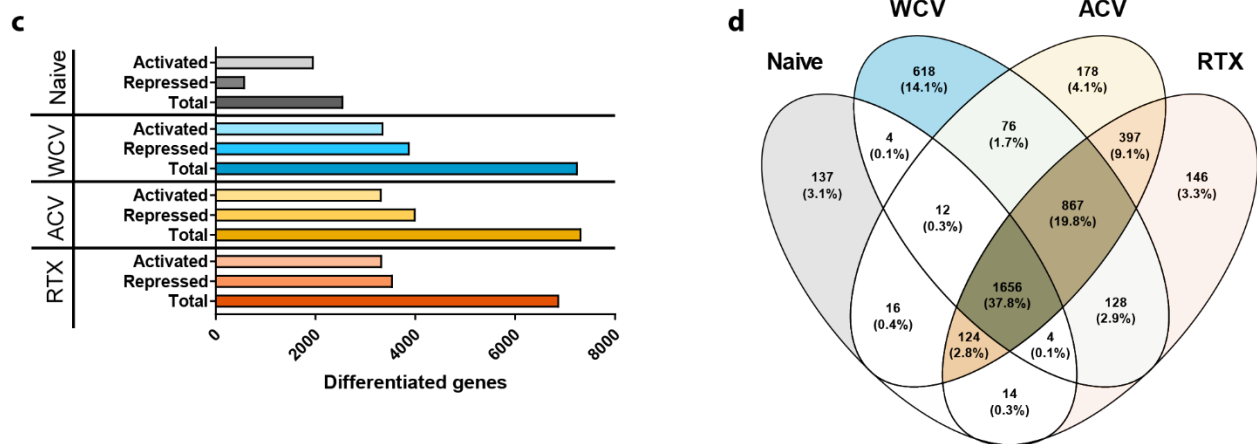

740

741

742 **Figure 6: Lung transcriptome profile of vaccinated and challenged NECre luc mice. RNA**

743 sequencing was performed on total RNA from homogenized lung on days 1 (Early) or 6/9 (Late)

744 following challenge with *B. pertussis*. (a) The total number of statically differentiated genes found

745 in lung transcriptome at early (a) or late (c) time-points. Statically differentiated genes were

746 categorized as those that were activated or repressed. Venn diagram of statically differentiated

747 genes either unique or common to vaccinated or naïve groups at early (b) or late (d) time-points.

748

749

750

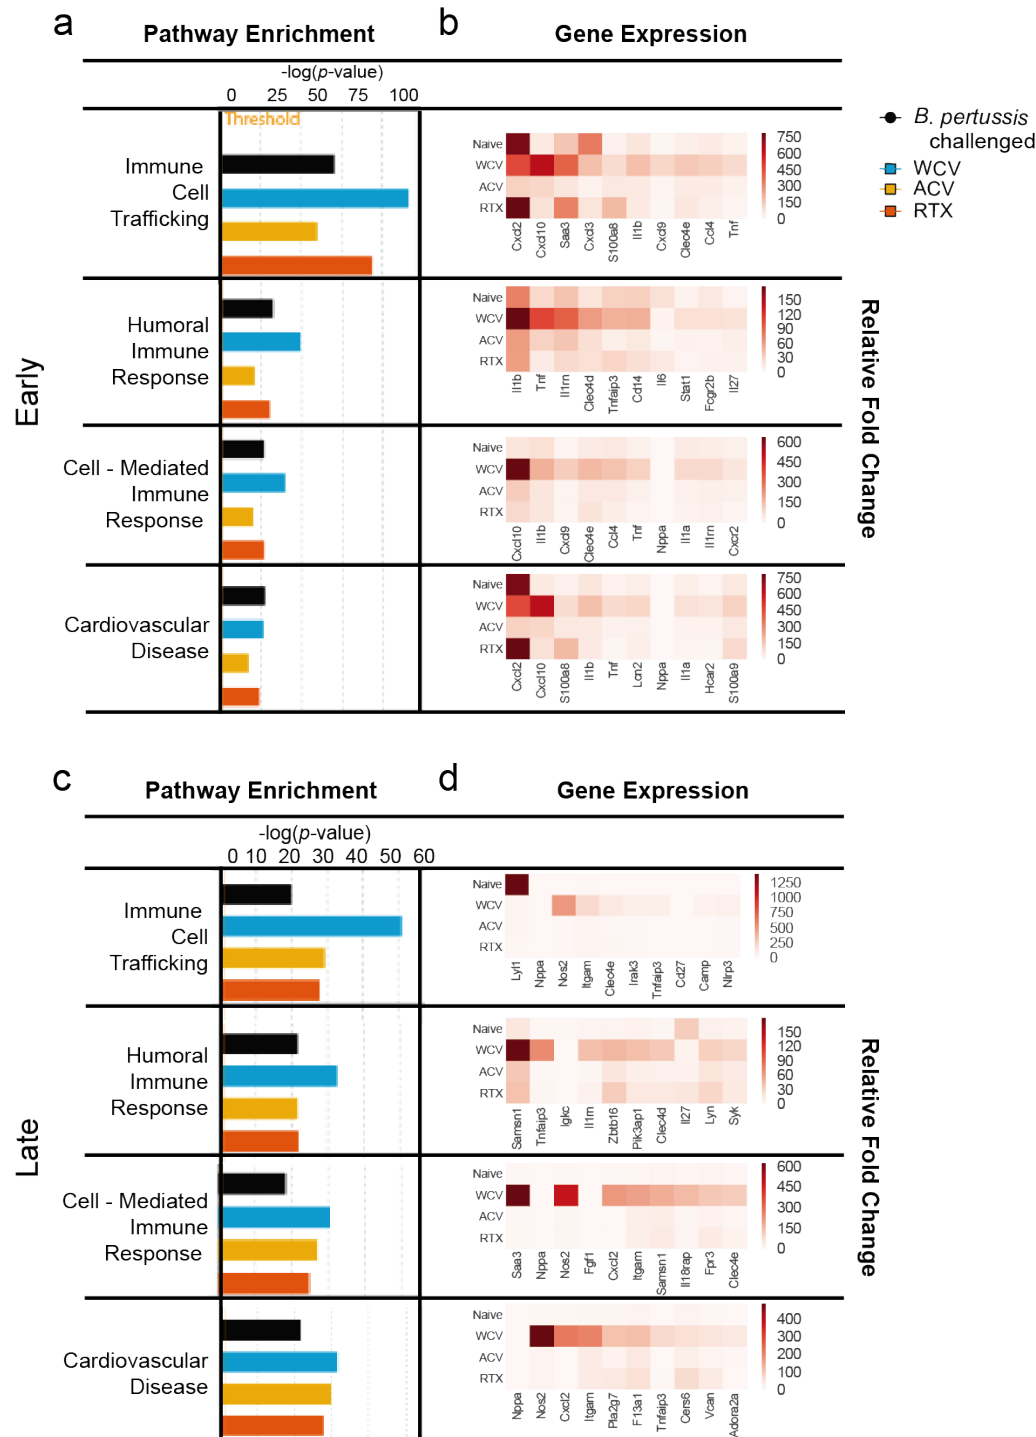

751

752 **Figure 7: Enrichment analysis and relative fold-changes of genes upregulated following *B.***

753 ***pertussis* challenge.** Early (day 1)(a), and late (day 9)(b) IPA comparative analysis of lung

754 transcriptomes from vaccinated and non-vaccinated/challenged groups was performed, gene

755 enrichment *p*-values are represented in  $-\log$  scale. *P*-value was calculated by IPA software based

756 on the number of genes found in a certain data set to the total number of genes associated to a  
757 particular function in the IPA knowledge base. Threshold indicates the significance ( $p < 0.05$ ,  
758 Fisher's exact t-test) Black-PBS, Blue – WCV, Yellow-ACV, Red – RTX. Relative fold changes of  
759 ten highest genes associated with a particular function annotation present in either of the  
760 experimental groups.

761

762

763

764

765

766

767

768

769

770

771

772

773

774

775

776

777

778

779

780

781

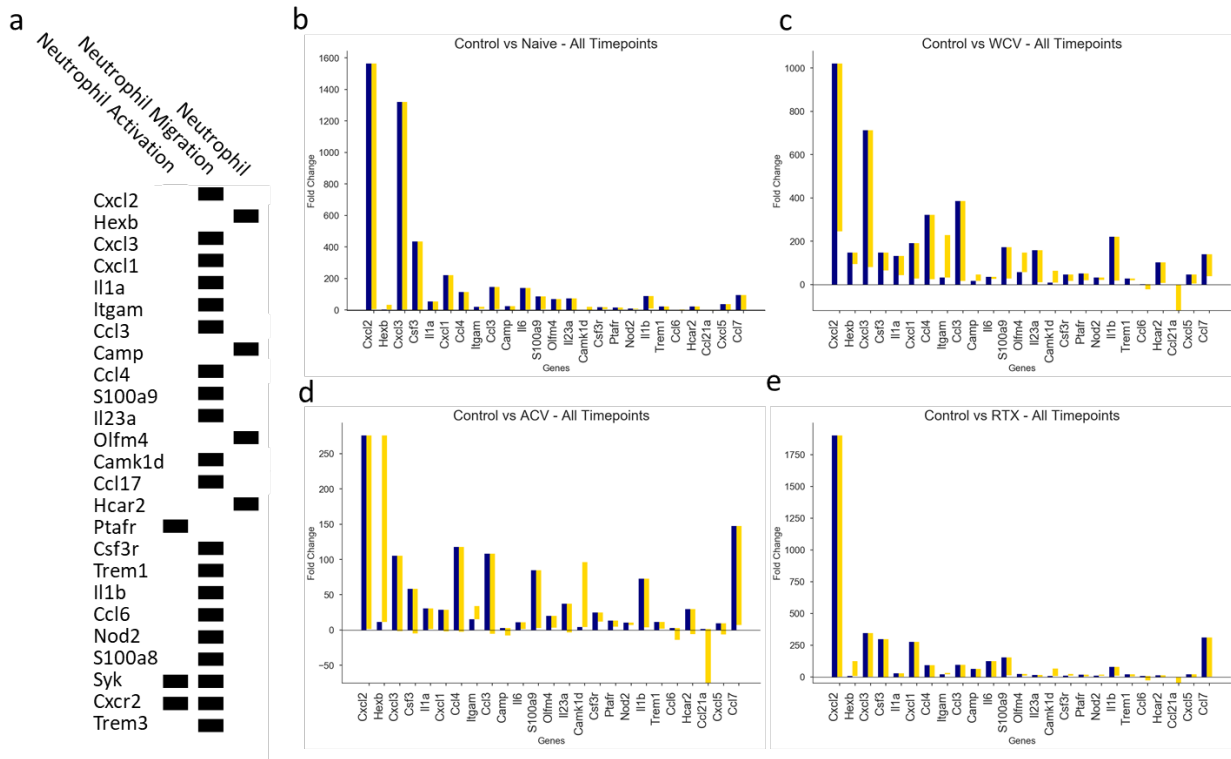

782

783 **Fig. 8: Differentiated genes associated with neutrophil recruitment at early and late time-**  
 784 **points following *B. pertussis* challenge.** Gene expression profiles are shown for (a) Naïve, (b)  
 785 WCV, (c) ACV, and (d) RTX immunized and challenged mice. Blue and gold bars indicate the fold  
 786 change compared to control non-challenge non-vaccinated mice at early and late time-points,  
 787 respectively. Genes shown are the 25 genes with the highest variance across all groups between  
 788 early and late time-point. Genes were ranked based on variance in fold change across groups for  
 789 the early and late time-points, separately.

790

791

792

793

794

795

796

797 **References**

- 798 1 Paddock CD, Sanden GN, Cherry JD, Gal AA, Langston C, Tatti KM, *et al.*  
799 Pathology and Pathogenesis of Fatal *Bordetella pertussis* Infection in Infants. *Clin*  
800 *Infect Dis* 2008;**47**:328–38. <https://doi.org/10.1086/589753>.
- 801 2 Andreasen C, Powell DA, Carbonetti NH. Pertussis toxin stimulates IL-17  
802 production in response to *Bordetella pertussis* infection in mice. *PLoS One*  
803 2009;**4**:e7079. <https://doi.org/10.1371/journal.pone.0007079>.
- 804 3 Carbonetti NH. Pertussis toxin and adenylate cyclase toxin: Key virulence factors  
805 of *Bordetella pertussis* and cell biology tools. *Future Microbiol* 2010;**5**:455–69.  
806 <https://doi.org/10.2217/fmb.09.133>.
- 807 4 Carbonetti NH. Contribution of pertussis toxin to the pathogenesis of pertussis  
808 disease. *Pathog Dis* 2015;**73**:ftv073. <https://doi.org/10.1093/femspd/ftv073>.
- 809 5 Carbonetti NH, Artamonova G V., Andreasen C, Bushar N. Pertussis toxin and  
810 adenylate cyclase toxin provide a one-two punch for establishment of *Bordetella*  
811 *pertussis* infection of the respiratory tract. *Infect Immun* 2005;**73**:2698–703.  
812 <https://doi.org/10.1128/IAI.73.5.2698-2703.2005>.
- 813 6 Sebo P, Osicka R, Masin J. Adenylate cyclase toxin-hemolysin relevance for  
814 pertussis vaccines. *Expert Rev Vaccines* 2014;**13**:1215–27.  
815 <https://doi.org/10.1586/14760584.2014.944900>.
- 816 7 Mattoo S, Cherry JD. Molecular pathogenesis, epidemiology, and clinical  
817 manifestations of respiratory infections due to *Bordetella pertussis* and other

- 818 Bordetella subspecies. *Clin Microbiol Rev* 2005;**18**:326–82.  
819 <https://doi.org/10.1128/CMR.18.2.326-382.2005>.
- 820 8 Gold MS. Hypotonic-Hyporesponsive Episodes Following Pertussis Vaccination.  
821 *Drug Saf* 2002;**25**:85–90. <https://doi.org/10.2165/00002018-200225020-00003>.
- 822 9 Donnelly S, Loscher CE, Lynch MA, Mills KHG. Whole-cell but not acellular  
823 pertussis vaccines induce convulsive activity in mice: Evidence of a role for toxin-  
824 induced interleukin-1?? in a new murine model for analysis of neuronal side effects  
825 of vaccination. *Infect Immun* 2001;**69**:4217–23.  
826 <https://doi.org/10.1128/IAI.69.7.4217-4223.2001>.
- 827 10 Ross PJ, Sutton CE, Higgins S, Allen AC, Walsh K, Misiak A, *et al*. Relative  
828 contribution of Th1 and Th17 cells in adaptive immunity to Bordetella pertussis:  
829 towards the rational design of an improved acellular pertussis vaccine. *PLoS*  
830 *Pathog* 2013;**9**:e1003264. <https://doi.org/10.1371/journal.ppat.1003264>.
- 831 11 Mills KHG, Ryan M, Ryan E, Mahon BP. A murine model in which protection  
832 correlates with pertussis vaccine efficacy in children reveals complementary roles  
833 for humoral and cell- mediated immunity in protection against Bordetella pertussis.  
834 *Infect Immun* 1998;**66**:594–602. <https://doi.org/10.1371/journal.ppat.1003264>.
- 835 12 Warfel JM, Merkel TJ. Bordetella pertussis infection induces a mucosal IL-17  
836 response and long-lived Th17 and Th1 immune memory cells in nonhuman  
837 primates. *Mucosal Immunol* 2013;**6**:787–96. <https://doi.org/10.1038/mi.2012.117>.
- 838 13 Carbonetti NH. Pertussis leukocytosis: mechanisms, clinical relevance and



- 839 treatment. *Pathog Dis* 2016;**74**:ftw087. <https://doi.org/10.1093/femspd/ftw087>.
- 840 14 Fedele G, Spensieri F, Palazzo R, Nasso M, Cheung GYC, Coote JG, *et al.*  
841 *Bordetella pertussis* commits human dendritic cells to promote a Th1/Th17  
842 response through the activity of adenylate cyclase toxin and MAPK-pathways.  
843 *PLoS One* 2010;**5**:e8734. <https://doi.org/10.1371/journal.pone.0008734>.
- 844 15 Mills KHG, Ross PJ, Allen AC, Wilk MM. Do we need a new vaccine to control the  
845 re-emergence of pertussis? *Trends Microbiol* 2014;**22**:49–52.  
846 <https://doi.org/10.1016/j.tim.2013.11.007>.
- 847 16 Klein NP, Bartlett J, Fireman B, Baxter R. Waning Tdap Effectiveness in  
848 Adolescents. *Pediatrics* 2016;**137**:e20153326–e20153326.  
849 <https://doi.org/10.1542/peds.2015-3326>.
- 850 17 Warfel JM, Beren J, Merkel TJ. Airborne transmission of bordetella pertussis. *J*  
851 *Infect Dis* 2012;**206**:902–6. <https://doi.org/10.1093/infdis/jis443>.
- 852 18 Althouse BM, Scarpino S V. Asymptomatic transmission and the resurgence of  
853 *Bordetella pertussis*. *BMC Med* 2015;**13**:146. [https://doi.org/10.1186/s12916-015-](https://doi.org/10.1186/s12916-015-0382-8)  
854 [0382-8](https://doi.org/10.1186/s12916-015-0382-8).
- 855 19 Betsou F, Sebo P, Guiso N. CyaC-mediated activation is important not only for toxic  
856 but also for protective activities of *Bordetella pertussis* adenylate cyclase-  
857 hemolysin. *Infect Immun* 1993;**61**:3583–9.
- 858 20 Cheung GYC, Xing D, Prior S, Corbel MJ, Parton R, Coote JG. Effect of different  
859 forms of adenylate cyclase toxin of *Bordetella pertussis* on protection afforded by

- 860 an acellular pertussis vaccine in a murine model. *Infect Immun* 2006;**74**:6797–805.  
861 <https://doi.org/10.1128/IAI.01104-06>.
- 862 21 Guiso N, Szatanik M, Rocancourt M. Protective activity of Bordetella adenylate  
863 cyclase-hemolysin against bacterial colonization. *Microb Pathog* 1991;**11**:423–31.  
864 [https://doi.org/10.1016/0882-4010\(91\)90038-C](https://doi.org/10.1016/0882-4010(91)90038-C).
- 865 22 Wang X, Maynard JA. The Bordetella adenylate cyclase repeat-in-toxin (RTX)  
866 domain is immunodominant and elicits neutralizing antibodies. *J Biol Chem*  
867 2015;**290**:3576–91. <https://doi.org/10.1074/jbc.M114.585281>.
- 868 23 Harvill ET, Cotter PA, Miller JF. Pregenomic comparative analysis between  
869 Bordetella bronchiseptica RB50 and Bordetella pertussis Tohama I in murine  
870 models of respiratory tract infection. *Infect Immun* 1999;**67**:6109–18.
- 871 24 Kirimanjeswara GS, Agosto LM, Kennett MJ, Bjornstad ON, Harvill ET. Pertussis  
872 toxin inhibits neutrophil recruitment to delay antibody-mediated clearance of  
873 Bordetella pertussis. *J Clin Invest* 2005;**115**:3594–601.  
874 <https://doi.org/10.1172/JCI24609>.
- 875 25 Andreasen C, Carbonetti NH. Role of neutrophils in response to bordetella  
876 pertussis infection in mice. *Infect Immun* 2009;**77**:1182–8.  
877 <https://doi.org/10.1128/IAI.01150-08>.
- 878 26 Weiss AA, Mary GMS. Lethal infection by Bordetella pertussis mutants in the infant  
879 mouse model. *Infect Immun* 1989;**57**:3757–64.
- 880 27 Goodwin MS, Weiss AA. Adenylate cyclase toxin is critical for colonization and

- 881 pertussis toxin is critical for lethal infection by *Bordetella pertussis* in infant mice.  
882 *Infect Immun* 1990;**58**:3445–7.
- 883 28 Locht C, Coutte L, Mielcarek N. The ins and outs of pertussis toxin n.d.  
884 <https://doi.org/10.1111/j.1742-4658.2011.08237.x>.
- 885 29 Froehlich. Beitrag zur pathologie des Keuchhustens. *Jahrb Fur Kinderheilkd*  
886 1897;**44**..
- 887 30 Meunier H. De la leucocytose dans la coqueluche. *CR Soc Biol* 1898;**50**..
- 888 31 MORSE SI. STUDIES ON THE LYMPHOCYTOSIS INDUCED IN MICE BY  
889 BORDETELLA PERTUSSIS. *J Exp Med* 1965;**121**:49–68.  
890 <https://doi.org/10.1084/jem.121.1.49>.
- 891 32 Morse SI, Riester SK. Studies on the leukocytosis and lymphocytosis induced by  
892 *Bordetella pertussis*. I. Radioautographic analysis of the circulating cells in mice  
893 undergoing pertussis-induced hyperleukocytosis. *J Exp Med* 1967;**125**:401–8.  
894 <https://doi.org/10.1084/jem.125.3.401>.
- 895 33 Weiner ZP, Ernst SM, Boyer AE, Gallegos-Candela M, Barr JR, Glomski IJ.  
896 Circulating lethal toxin decreases the ability of neutrophils to respond to *Bacillus*  
897 anthracis. *Cell Microbiol* 2014;**16**:504–18. <https://doi.org/10.1111/cmi.12232>.
- 898 34 Higgs R, Higgins SC, Ross PJ, Mills KHG. Immunity to the respiratory pathogen  
899 *Bordetella pertussis*. *Mucosal Immunol* 2012;**5**:485–500.  
900 <https://doi.org/10.1038/mi.2012.54>.
- 901 35 Ross PJ, Sutton CE, Higgins S, Allen AC, Walsh K, Misiak A, *et al*. Relative

- 902 contribution of Th1 and Th17 cells in adaptive immunity to *Bordetella pertussis* :  
903 towards the rational design of an improved acellular pertussis vaccine. *PLoS*  
904 *Pathog* 2013;**9**:e1003264. <https://doi.org/10.1371/journal.ppat.1003264>.
- 905 36 Alvarez Hayes J, Erben E, Lamberti Y, Principi G, Maschi F, Ayala M, *et al.*  
906 *Bordetella pertussis* iron regulated proteins as potential vaccine components.  
907 *Vaccine* 2013;**31**:3543–8. <https://doi.org/10.1016/j.vaccine.2013.05.072>.
- 908 37 Sawal M, Cohen M, Irazuzta JE, Kumar R, Kirton C, Brundler M-A, *et al.* Fulminant  
909 pertussis: A multi-center study with new insights into the clinico-pathological  
910 mechanisms. *Pediatr Pulmonol* 2009;**44**:970–80.  
911 <https://doi.org/10.1002/ppul.21082>.
- 912 38 Pierce C, Klein N, Peters M. Is leukocytosis a predictor of mortality in severe  
913 pertussis infection? *Intensive Care Med* 2000;**26**:1512–4.
- 914 39 Alves-Filho JC, Freitas A, Souto FO, Spiller F, Paula-Neto H, Silva JS, *et al.*  
915 Regulation of chemokine receptor by Toll-like receptor 2 is critical to neutrophil  
916 migration and resistance to polymicrobial sepsis. *Proc Natl Acad Sci U S A*  
917 2009;**106**:4018–23. <https://doi.org/10.1073/pnas.0900196106>.
- 918 40 Raeven RHM, Van Der Maas L, Tilstra W, Uittenbogaard JP, Bindels THE, Kuipers  
919 B, *et al.* Immunoproteomic Profiling of *Bordetella pertussis* Outer Membrane  
920 Vesicle Vaccine Reveals Broad and Balanced Humoral Immunogenicity. *J*  
921 *Proteome Res* 2015;**14**:2929–42. <https://doi.org/10.1021/acs.jproteome.5b00258>.
- 922 41 Starost LJ, Karassek S, Sano Y, Kanda T, Kim KS, Dobrindt U, *et al.* Pertussis

- 923 Toxin Exploits Host Cell Signaling Pathways Induced by Meningitis-Causing E. coli  
924 K1-RS218 and Enhances Adherence of Monocytic THP-1 Cells to Human Cerebral  
925 Endothelial Cells. *Toxins (Basel)* 2016;**8**:291.  
926 <https://doi.org/10.3390/toxins8100291>.
- 927 42 Cotoi OS, Dunér P, Ko N, Hedblad B, Nilsson J, Björkbacka H, *et al.* Plasma  
928 S100A8/A9 correlates with blood neutrophil counts, traditional risk factors, and  
929 cardiovascular disease in middle-aged healthy individuals. *Arterioscler Thromb*  
930 *Vasc Biol* 2014;**34**:202–10. <https://doi.org/10.1161/ATVBAHA.113.302432>.
- 931 43 Vogl T, Ludwig S, Goebeler M, Strey A, Thorey IS, Reichelt R, *et al.* MRP8 and  
932 MRP14 control microtubule reorganization during transendothelial migration of  
933 phagocytes. *Blood* 2004;**104**:4260–8. <https://doi.org/10.1182/blood-2004-02-0446>.
- 934 44 Kumar H, Kumagai Y, Tsuchida T, Koenig PA, Satoh T, Guo Z, *et al.* Involvement  
935 of the NLRP3 Inflammasome in Innate and Humoral Adaptive Immune Responses  
936 to Fungal -Glucan. *J Immunol* 2009;**183**:8061–7.  
937 <https://doi.org/10.4049/jimmunol.0902477>.
- 938 45 Gabrilovich DI. *The Neutrophils: New Outlook for Old Cells*. Singapore, UNITED  
939 STATES: Imperial College Press; 2014.
- 940 46 Mahon BP, Sheahan BJ, Griffin F, Murphy G, Mills KH. Atypical disease after  
941 Bordetella pertussis respiratory infection of mice with targeted disruptions of  
942 interferon-gamma receptor or immunoglobulin mu chain genes. *J Exp Med*  
943 1997;**186**:1843–51.

- 944 47 Kirimanjeswara GS, Mann PB, Harvill ET. Role of antibodies in immunity to  
945 Bordetella infections. *Infect Immun* 2003;**71**:1719–24.  
946 <https://doi.org/10.1128/iai.71.4.1719-1724.2003>.
- 947 48 Bolotin DA, Poslavsky S, Mitrophanov I, Shugay M, Mamedov IZ, Putintseva E V,  
948 *et al.* MiXCR: software for comprehensive adaptive immunity profiling. *Nat Methods*  
949 2015;**12**:380–1. <https://doi.org/10.1038/nmeth.3364>.
- 950 49 Xu JL, Davis MM. Diversity in the CDR3 region of V(H) is sufficient for most antibody  
951 specificities. *Immunity* 2000;**13**:37–45. [https://doi.org/10.1016/S1074-](https://doi.org/10.1016/S1074-7613(00)00006-6)  
952 [7613\(00\)00006-6](https://doi.org/10.1016/S1074-7613(00)00006-6).
- 953 50 Nguyen AW, Wagner EK, Laber JR, Goodfield LL, Smallridge WE, Harvill ET, *et al.*  
954 A cocktail of humanized anti-pertussis toxin antibodies limits disease in murine and  
955 baboon models of whooping cough. *Sci Transl Med* 2015;**7**:316ra195.  
956 <https://doi.org/10.1126/scitranslmed.aad0966>.
- 957 51 Im S-Y, Wiedmeier SE, Cho B-H, Lee DG, Beigi M, Daynes RA. Dual effects of  
958 pertussis toxin on murine neutrophils in vivo. *Inflammation* 1989;**13**:707–26.  
959 <https://doi.org/10.1007/BF00914314>.
- 960 52 Winter K, Zipprich J, Harriman K, Murray EL, Gornbein J, Hammer SJ, *et al.* Risk  
961 Factors Associated With Infant Deaths From Pertussis: A Case-Control Study. *Clin*  
962 *Infect Dis* 2015;**61**:1099–106. <https://doi.org/10.1093/cid/civ472>.
- 963 53 Heininger U, Klich K, Stehr K, Cherry JD. Clinical findings in Bordetella pertussis  
964 infections: results of a prospective multicenter surveillance study. *Pediatrics*

- 965 1997;**100**:E10. <https://doi.org/10.1542/peds.100.6.e10>.
- 966 54 Guiso N, Rocancourt M, Szatanik M, Alonso JM. Bordetella adenylate cyclase is a  
967 virulence associated factor and an immunoprotective antigen. *Microb Pathog*  
968 1989;**7**:373–80. [https://doi.org/10.1016/0882-4010\(89\)90040-5](https://doi.org/10.1016/0882-4010(89)90040-5).
- 969 55 Torres CA, Iwasaki A, Barber BH, Robinson HL. Differential dependence on target  
970 site tissue for gene gun and intramuscular DNA immunizations. *J Immunol*  
971 1997;**158**:4529–32.
- 972 56 Bassinet L, Fitting C, Housset B, Cavaillon JM, Guiso N. Bordetella pertussis  
973 adenylate cyclase-hemolysin induces interleukin-6 secretion by human tracheal  
974 epithelial cells. *Infect Immun* 2004;**72**:5530–3.  
975 <https://doi.org/10.1128/IAI.72.9.5530-5533.2004>.
- 976 57 Raeven RHM, Brummelman J, Pennings JLA, Nijst OEM, Kuipers B, Blok LER, *et*  
977 *al.* Molecular signatures of the evolving immune response in mice following a  
978 Bordetella pertussis infection. *PLoS One* 2014;**9**:e104548.  
979 <https://doi.org/10.1371/journal.pone.0104548>.
- 980 58 Moreno G, Errea A, Van Maele L, Roberts R, Léger H, Sirard JC, *et al.* Toll-like  
981 receptor 4 orchestrates neutrophil recruitment into airways during the first hours of  
982 Bordetella pertussis infection. *Microbes Infect* 2013;**15**:708–18.  
983 <https://doi.org/10.1016/j.micinf.2013.06.010>.
- 984 59 Brickman TJ, Armstrong SK. The ornithine decarboxylase gene *odc* is required for  
985 alcaligin siderophore biosynthesis in *Bordetella* spp.: Putrescine is a precursor of

- 986           alcaligin. *J Bacteriol* 1996;**178**:54–60. <https://doi.org/10.1128/jb.178.1.54-60.1996>.
- 987   60    Stainer DW, Scholte MJ. A Simple Chemically Defined Medium for the Production  
988       of Phase I *Bordetella pertussis*. *J Gen Microbiol* 1970;**63**:211–20.  
989       <https://doi.org/10.1099/00221287-63-2-211>.
- 990   61    Evans MS, Chaurette JP, Adams ST, Reddy GR, Paley MA, Aronin N, *et al.* A  
991       synthetic luciferin improves bioluminescence imaging in live mice. *Nat Methods*  
992       2014;**11**:393–5. <https://doi.org/10.1038/nmeth.2839>.
- 993   62    Damron FH, Oglesby-Sherrouse AG, Wilks A, Barbier M. Dual-seq transcriptomics  
994       reveals the battle for iron during *Pseudomonas aeruginosa* acute murine  
995       pneumonia. *Sci Rep* 2016;**6**:. <https://doi.org/Artn 39172 10.1038/Srep39172>.
- 996   63    Olivers JC. Venny. An interactive tool for comparing lists with Venn's diagrams n.d.
- 997   64    Carbon S, Ireland A, Mungall CJ, Shu S, Marshall B, Lewis S, *et al.* AmiGO: online  
998       access to ontology and annotation data. *Bioinformatics* 2009;**25**:288–9.  
999       <https://doi.org/10.1093/bioinformatics/btn615>.
- 1000   65    Shugay M, Bagaev D V, Turchaninova MA, Bolotin DA, Britanova O V, Putintseva  
1001       E V, *et al.* VDJtools: Unifying Post-analysis of T Cell Receptor Repertoires. *PLoS*  
1002       *Comput Biol* 2015;**11**:e1004503. <https://doi.org/10.1371/journal.pcbi.1004503>.

1003

1004
